# Supplementary material for: Short communication: A semi-automated method for rapid fault slip analysis from topographic scarp profiles
Source: Copernicus journal article supplement (doi:10.5194/esurf-2019-53), 2019-10-15
Supplement: Supplementary file 1 [file esurf-2019-53-supplement.pdf]

# **A semi-automated method for rapid fault slip analysis from topographic scarp profiles**

## **User manual**

Franklin D. Wolfe<sup>1</sup>, Timothy A. Stahl<sup>2</sup>, Pilar Villamor<sup>3</sup>, Biljana Lukovic<sup>3</sup>

<sup>1</sup>Harvard University, Cambridge, MA, USA

<sup>2</sup>University of Canterbury, Christchurch, NZ

<sup>3</sup>GNS Science, Lower Hutt, NZ

Please contact [wolfe\\_franklin@g.harvard.edu](mailto:wolfe_franklin@g.harvard.edu) for questions or additional information.

## **Table of Contents**

- (1) Overview
- (2) Profile Selection
  - a. QGIS
  - b. ArcGIS
- (3) Profile Data Extraction
  - a. QGIS – compiled plug-ins
  - b. ArcGIS – ArcGIS Toolbox or Python Stand Alone 2.7.13 script
- (4) Fault Scarp Analysis GUI
  - a. Jupyter Notebook Python 3 coding environment
- (5) Monte Carlo Slip Statistics Calculation
  - a. Jupyter Notebook Python 3 coding environment
- (6) Outputs
- (7) Data Display in GIS
  - a. QGIS – compiled plug-in
  - b. ArcGIS – ArcGIS Toolbox or Python Stand Alone 2.7.13 script

## Overview

Wolfe et al. (2019) introduces an open source, semi-automated, Python-based graphical user interface (GUI) called the Monte Carlo Slip Statistics Toolkit (MCSST) for estimating dip slip on individual or bulk fault datasets. Using this toolkit, profiles are defined across fault scarps in high-resolution digital elevation models (DEMs) and then relevant fault scarp components are interactively identified (e.g., footwall, hanging wall, and scarp). We reference hanging wall and footwall throughout because this code was developed for use in a rift setting; however, upthrown and downthrown are equally viable terms considering the underlying math should be consistent for reverse faults as well.

Displacement statistics are calculated automatically using Monte Carlo simulation (Thompson et al., 2002) and can be conveniently visualized in Geographic Information Systems (GIS) for spatial analysis. Fault slip rates can also be calculated when ages of footwall and hanging wall surfaces are known, allowing for temporal analysis. This method allows for rapid analysis of tens to hundreds of faults in rapid succession within GIS and a Python coding environment. Application of this method may contribute to a wide range of regional and local earthquake geology studies with adequate high-resolution DEM coverage, both regional fault source characterization for seismic hazard and/or estimating geologic slip and strain rates, including creating long-term deformation maps. An ArcGIS version of these functions are available, as well ones that utilize free, open source Quantum GIS (QGIS) and Jupyter Notebook Python software.

This manual provides step by step directions for implementing the workflow. Whether using a QGIS or ArcGIS interphase, instructions are provided on how to extract data from profiles drawn across fault scarps imaged in high resolution digital elevation data. Next, instructions on how to implement the MCSST to rapidly calculate slip statistics for the faults in question. Lastly, instructions are provided on how to visualize the results in the QGIS and ArcGIS interphases.

All of these scripts and notebooks are available for download at the GitHub repository. The scripts were developed in Python 2.7.13 (to be compatible with ArcGIS). ArcGIS v 10.5.1 was used for testing but it might work in other 10 versions

The first step is to define profiles across fault scarps imaged in digital elevation data.

## A) QGIS

- Create a new Shapefile Layer
  - Layer -> Create Layer -> New Shapefile Layer
  - Geometry Type -> Line

[illegible]

- The newly-created Shapefile layer show up in the Layers inventory.
- To draw a profile and assign it to this layer, Toggle Editing on this layer.
  - Add Line Feature to draw your profile. Both Toggle Editing and Add Line Feature can be found in the banner of icons at the top of the program (see image below).
  - You may want to edit the Style of the lines so that they will have greater visibility.
- Next, Save Layer Edits to permanently create your profile lines within the Shapefile layer.



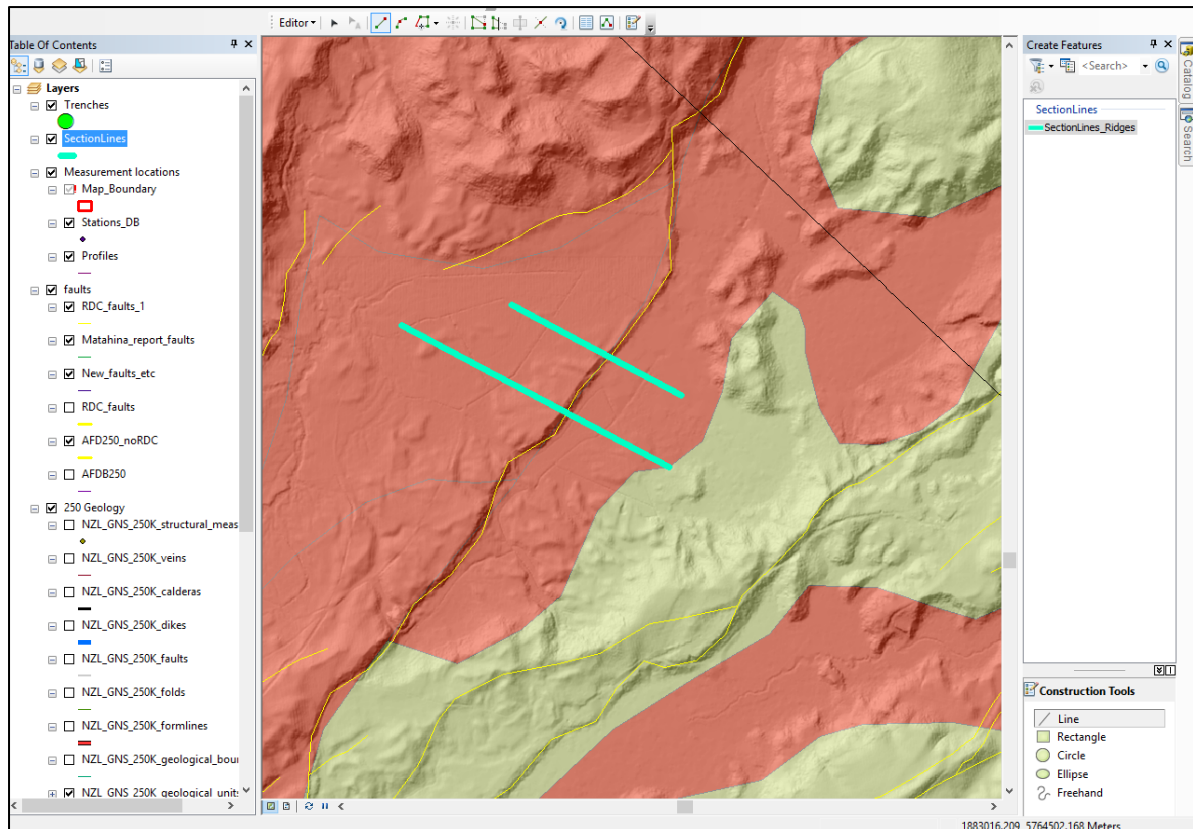

- The Section Line Feature Class must have a “id” field. This is a field that may need to be added manually to the attribute table. To do this, open the attribute table, add field titled “id”, and then run an operator on the new “id” field to populate this field with the values of the “ObjectID” field. The operator tool is called the “Field Calculator” tool. You will see that when you open this tool, a blank dialogue box appears. You also see the beginning of a calculation right above. Fill in the rest of the calculation as “= ObjectID”. Next hit OK. You will only be able to undo your edits if you are in an edit session, so to be cautious, do this before you “stop editing”.

## Profile Data Extraction

Once you have defined your profiles, the next step is to generate data along the profile. Plug-ins for ArcGIS and QGIS can be utilized for this process.

**If you do not have geologic data (e.g., age, formation name, etc.) you will need to quickly generate this data by following this workaround for ArcGIS and QGIS.**

### A) ArcGIS

The goal of this workflow is to create a new polygon feature class to contain user-generated geologic data so that the toolbox will function in the following step to extract data.

- Create a new polygon feature class
  - Navigate to the ArcGIS Catalog
  - Right click on a geodatabase
  - Generate a new Polygon Feature Class
  - Include new fields for age and geology as is shown in image below

| Field Name | Data Type |
|------------|-----------|
| OBJECTID   | Object ID |
| SHAPE      | Geometry  |
| Age_Min    | Float     |
| Age_Max    | Float     |
| Geology    | Text      |

Click any field to see its properties.

Field Properties

|                   |         |
|-------------------|---------|
| Alias             | Geology |
| Allow NULL values | Yes     |
| Default Value     |         |
| Length            | 50      |

Import...

To add a new field, type the name into an empty row in the Field Name column, click in the Data Type column to choose the data type, then edit the Field Properties.

< Back Finish Cancel

- Right click on the new Feature class and choose Start Editing
- Create a polygon feature that encompasses the entire study area.

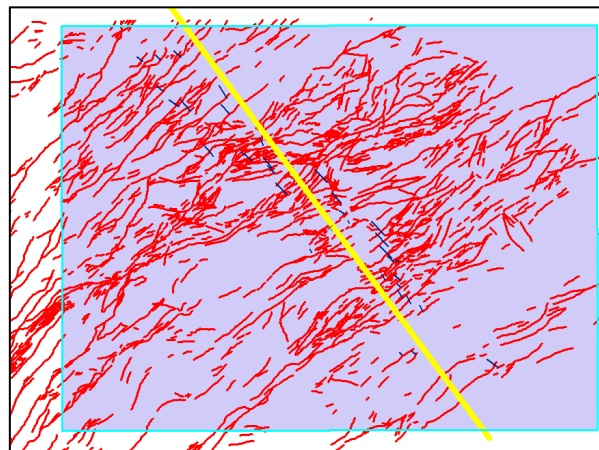

- Create a polygon feature that encompasses the entire study area.

- Manually input data into the Attribute Table

| Table              |            |         |         |         |         |              |                 |
|--------------------|------------|---------|---------|---------|---------|--------------|-----------------|
| Geology_Workaround |            |         |         |         |         |              |                 |
|                    | OBJECTID * | SHAPE * | Age_Min | Age_Max | Geology | SHAPE_Length | SHAPE_Area      |
| ▶                  | 1          | Polygon | 10      | 20      | Test    | 65716.47262  | 264759903.37484 |
|                    |            |         |         |         |         |              |                 |

- Save Edits and Stop Editing

## B) QGIS

- Create a new polygon Shapefile Layer
- Add new fields for age and geology

New Shapefile Layer

File name: /Users/franklinwolfe/Dropbox/ForFranklin/Geology\_Workaround\_QGIS.shp

File encoding: UTF-8

Geometry type: Polygon

☐ Include Z dimension ☐ Include M values

EPSG:2193 - NZGD2000 / New Zealand Transverse Mercator 2000

**New Field**

Name: Geology

Type: Text data

Length: 20 Precision:

Add to Fields List

**Fields List**

| Name    | Type    | Length | Precision |
|---------|---------|--------|-----------|
| id      | Integer | 10     |           |
| Age_Min | Real    | 20     |           |
| Age_Max | Real    | 20     |           |
| Geology | String  | 20     |           |

Remove Field

Help Cancel OK

- Toggle Editing
- Draw new Polygon Feature encompassing entire study site and input information for age and geology when prompted.
- Toggle Editing to Save Edits



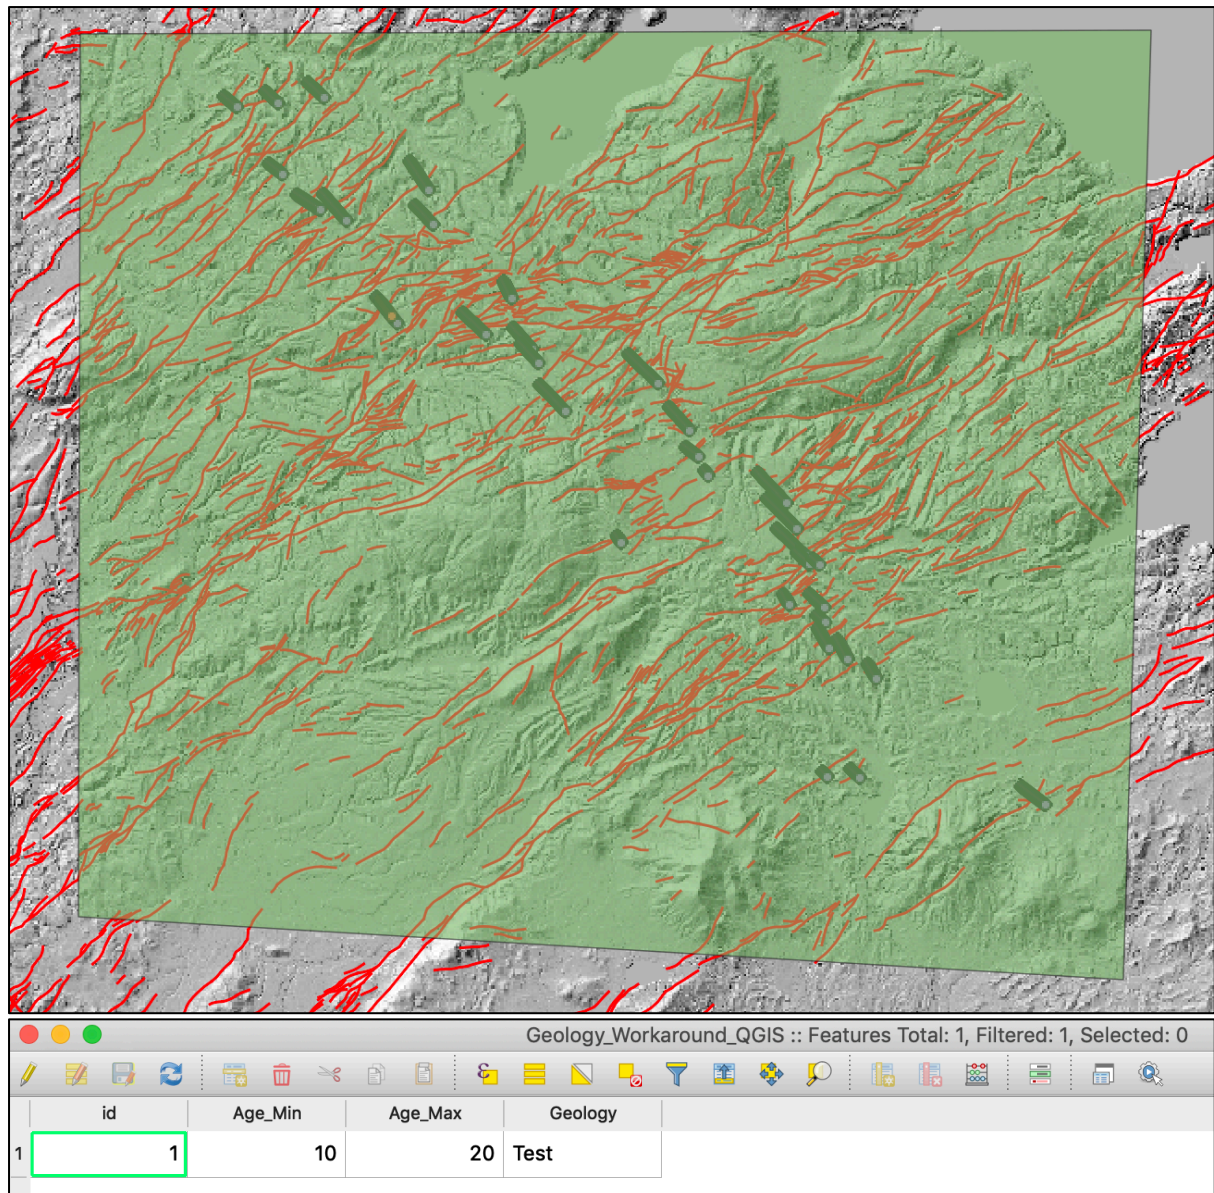

## Extracting Data

### C) QGIS

Previously compiled GUIs can be employed to extract distance, elevation, and geologic age data along the fault profiles at variable spacing. The user will employ the Points Along Geometry and Point Sampling Tool plugins, which are within the QGIS environment.

The Points Along Geometry Tool plugin creates points at regular intervals along line or polygon geometries. Created points have new attributes added for the distance along the geometry and the angle of the line at the point. An optional start and end offset can be specified, which controls how far from the start and end of the geometry the points should be created. This can be useful if you do not want to include the entire fault scarp profile; however, it is often simplest to start and end at the terminal points of the profile.

If you do not see these tools, you can find them in the Manage and Install Plugins feature of QGIS.

- Within the Toolbox, navigate to and open the Points Along Geometry Tool.

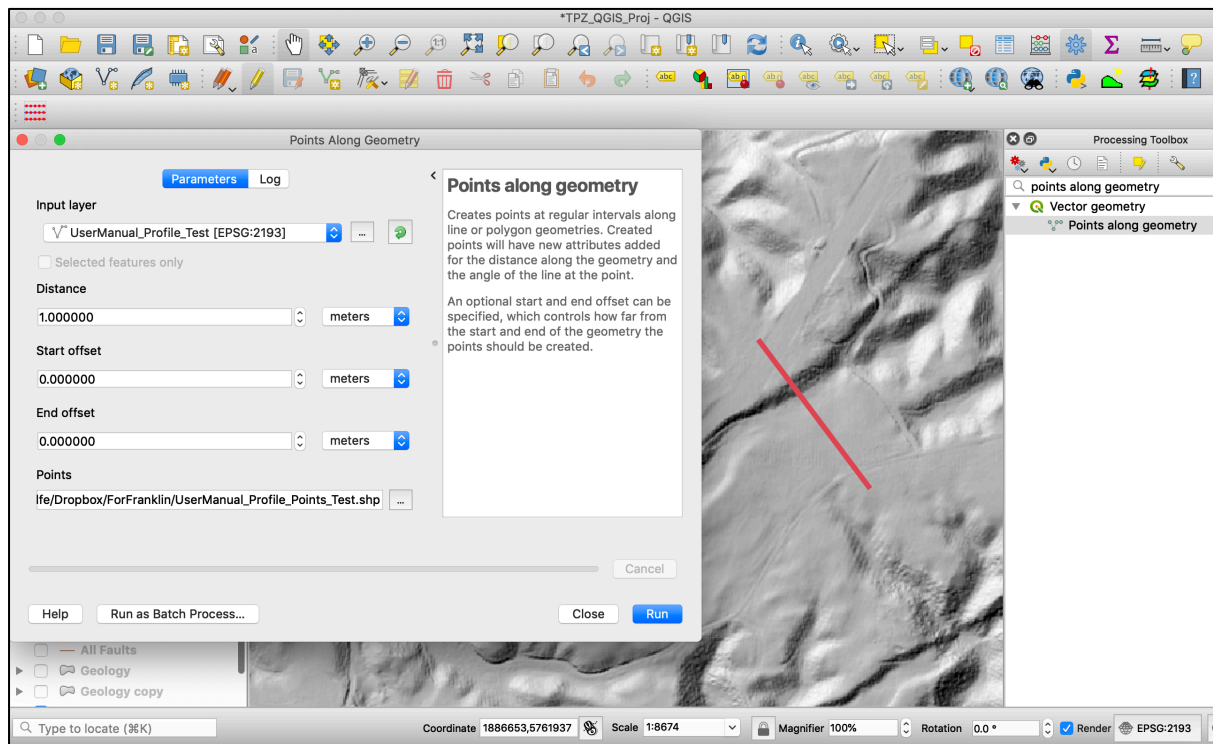

- Set your density of points along the profile. Here I have set it to 1 meter.
- Add a file path and new file name to create a new file for the points in the final dialogue box.

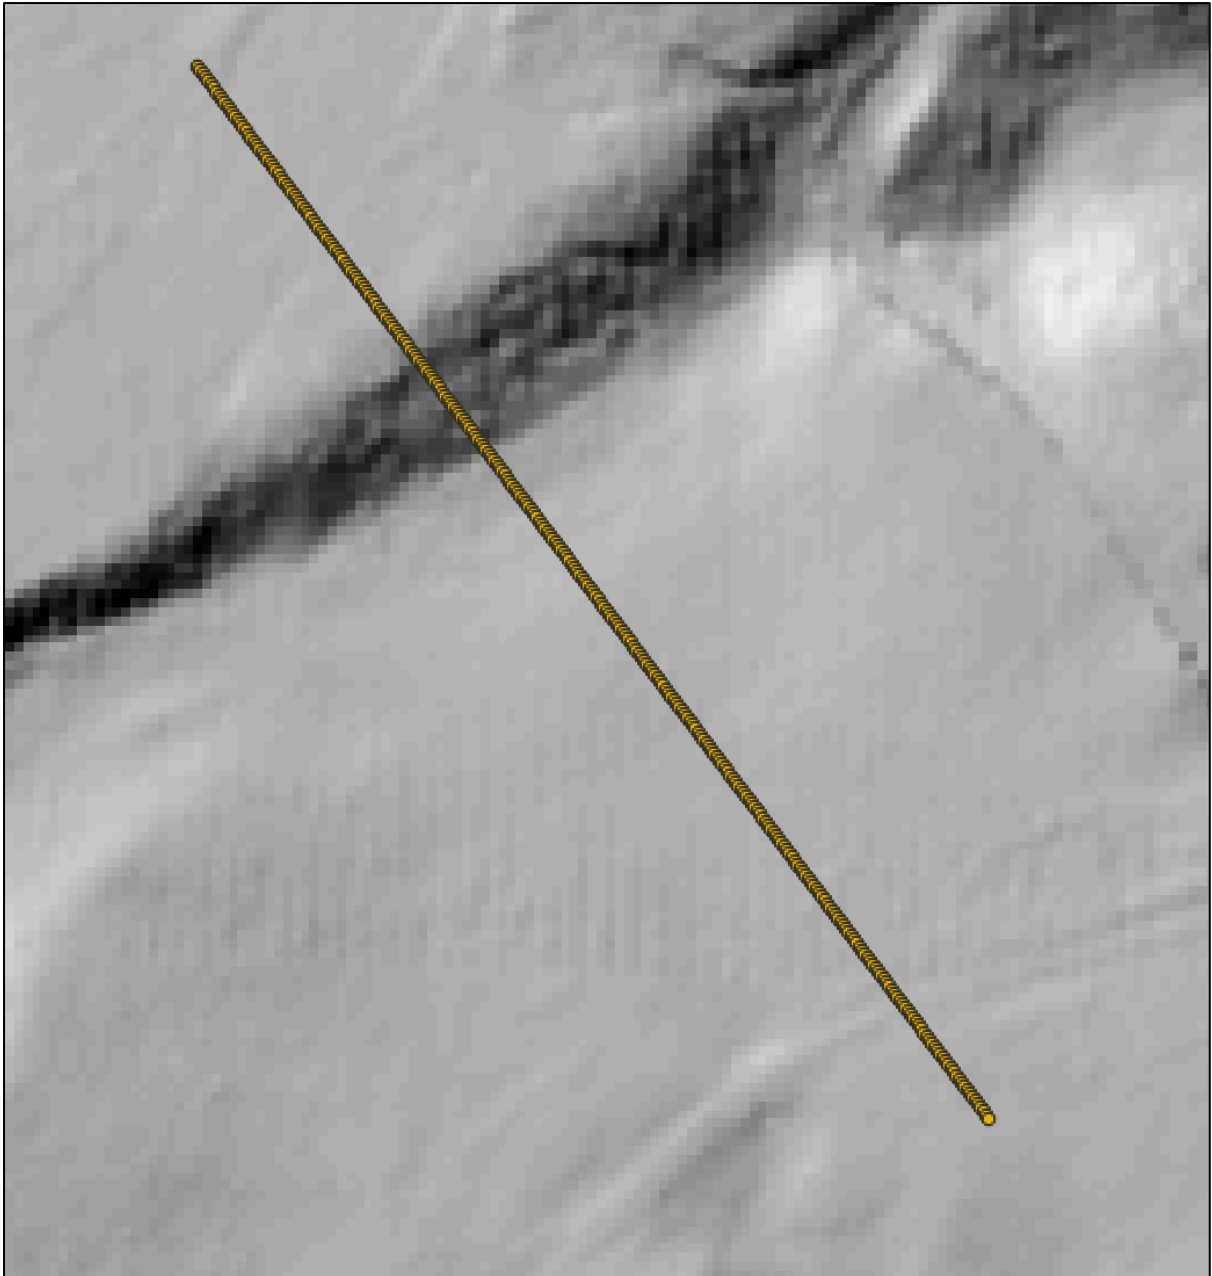

- You can now see that the profile is composed of many points spaced at 1 meter.

The Point Sampling Tool plugin collects polygon attributes and raster values from multiple layers at the specified sampling points created using the Points Along Geometry Tool plugin. The user needs a point layer (our newly created points) with locations of the sampling points and at least one polygon or raster layer from which to probe values (the elevation and geologic age data). The plugin creates a new point layer with locations given by the sampling points and attributes taken from the underlying polygon or/and raster cells, which represent the data that can be extracted from the high-resolution DEM and geologic map.

- You may need to install the Point Sampling Tool from the Manage and Install Plugins function
- Make active all layers you wish to extract data from (e.g., Geology and Elevation Data).
- Designate name for output file and save it as a Shapefile. The default is Geopackage.

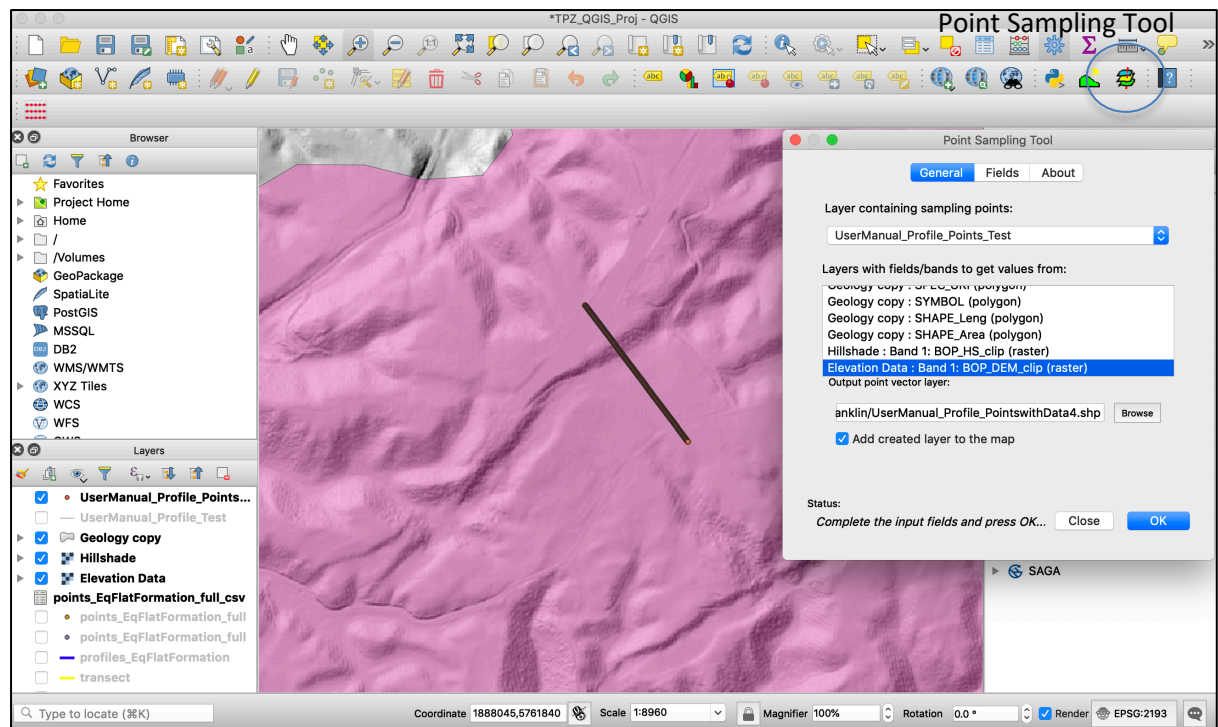

UserManual\_Profile\_PointswithData4.shp :: Features Total: 295, Filtered: 295, Selected: 0

|    | id | distance       | MAPNAME        | ABSMIN_MA     | ABSMAX_MA     | Elevation |
|----|----|----------------|----------------|---------------|---------------|-----------|
| 1  | 1  | 0.00000000...  | Earthquake ... | 0.06000000... | 0.06200000... | 484.50000 |
| 2  | 1  | 1.00000000...  | Earthquake ... | 0.06000000... | 0.06200000... | 484.50000 |
| 3  | 1  | 2.00000000...  | Earthquake ... | 0.06000000... | 0.06200000... | 484.48999 |
| 4  | 1  | 3.00000000...  | Earthquake ... | 0.06000000... | 0.06200000... | 484.48999 |
| 5  | 1  | 4.00000000...  | Earthquake ... | 0.06000000... | 0.06200000... | 484.42667 |
| 6  | 1  | 5.00000000...  | Earthquake ... | 0.06000000... | 0.06200000... | 484.41190 |
| 7  | 1  | 6.00000000...  | Earthquake ... | 0.06000000... | 0.06200000... | 484.41190 |
| 8  | 1  | 7.00000000...  | Earthquake ... | 0.06000000... | 0.06200000... | 484.45001 |
| 9  | 1  | 8.00000000...  | Earthquake ... | 0.06000000... | 0.06200000... | 484.45001 |
| 10 | 1  | 9.00000000...  | Earthquake ... | 0.06000000... | 0.06200000... | 484.37500 |
| 11 | 1  | 10.00000000... | Earthquake ... | 0.06000000... | 0.06200000... | 484.37500 |
| 12 | 1  | 11.00000000... | Earthquake ... | 0.06000000... | 0.06200000... | 484.37500 |
| 13 | 1  | 12.00000000... | Earthquake ... | 0.06000000... | 0.06200000... | 484.31000 |

Show All Features

- The above photo is the output of the process. You can see that at each point, geologic age and elevation data have been extracted.

#### D) ArcGIS



The user has two options to complete this process with ArcGIS. The first is with an ArcToolbox and the second is with a Stand Alone Python script. Both of these were developed for this study. Please note: The scripts were developed in Python 2.7.13 (to be compatible with ArcGIS), ArcGIS v 10.5.1 was used for testing but it might work in other 10 versions, and the user will require the ArcGIS (for both) and Spatial Analyst (for createProfileCSV.py only) licenses to run these scripts

### ArcToolbox Approach

- The ArcGIS\_Toolbox folder contains the ArcGIS Toolbox together with the scripts that are called from it. The user will have to copy the whole folder to their machine (to maintain relative paths within the toolbox) and add the toolbox to their ArcMap project or ArcCatalog. The scripts could be run from there and ArcGIS has an interface for entering inputs (see below).
- Within ArcGIS, the user must navigate to their ArcToolbox, right click, and select Add Toolbox.
- Add the FaultProfile Toolbox to the working environment through this process.
- Double click on the 'createProfileCSV' tool within this newly added toolbox.

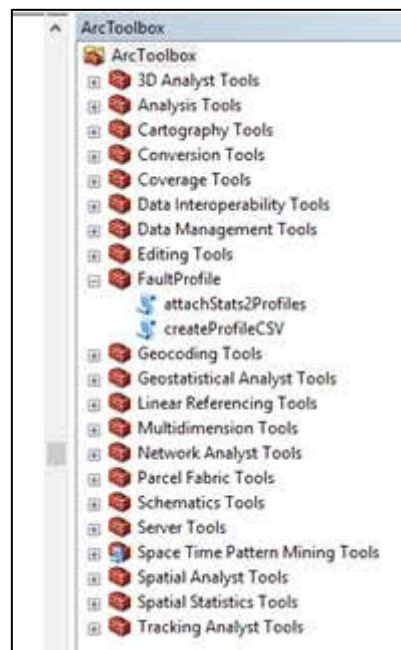

createProfileCSV

Working folder  
C:\Users\frw313\Dropbox\Research\GNS\NetSlipRates\Python\Profiles\Raw

DEM  
C:\Users\frw313\ForFranklin\ForFranklin.gdb\DigitalElevationModel8m

Geology layer  
NZL\_GNS\_250K\_geological\_units

Age MIN field  
ABSMIN\_MA

Age MAX field  
ABSMAX\_MA

Unit Name field  
MAPNAME

Profile layer  
profiles\_EqFlatFormation

Profile ID field  
id

Point distance  
1

OK Cancel Environments... Show Help >>

- Fill in the dialogue boxes as appropriate
  - The Working folder is the location to output your soon to be created profile data. It would make sense to make the output folder the working directory for your Jupyter Notebook environment so that you can easily navigate to the newly created profiles in the fault scarp analysis step.
  - The DEM is the elevation file from which you wish to extract the elevation data
  - The Geology layer is the shapefile layer that contains the age and unit name information
  - Select the age fields and unit name fields from the drop-down menus. These are headers within the Geology layer chosen.
  - The Profile layer is the shapefile layer created in the previous step that contains profiles drawn across fault scarps.
  - Select the unique id field for each profile of the Profile layer.
  - Select the point sampling density from which you would like to extract data along the profiles.
- The resulting profile data will be stored in a new folder within the Working folder assigned in the previous step. Each profile will be saved as a separate CSV. The name of the folder will be “outputs\_” + the name of your profile shapefile.

### Python Stand Alone Approach

- The createProfileCSV.py code can be used in a python standalone environment to complete the same workflow. It requires the user to manually input the entries for the dialogue boxes of the ArcToolbox approach, including the full path to each file. The user will be prompted to fill these in once the script is launched.
  - The code will create a csv file for each section line and put each file into a folder called “Outputs\_(name of your Line Feature Class)”.
  - The file for each profile will include a list of points at which the data was extracted.

[illegible]

## Fault Scarp Analysis GUI

Next, each fault scarp profile can be analysed in preparation for net slip calculations.

- An easy-to-use GUI is used to manually select the data to represent the Hanging wall, Footwall, and Scarp for each profile generated in the previous steps.
- The program of choice for running this section of the code is Jupyter Notebook, which can be downloaded online free by downloading Anaconda <https://www.anaconda.com/download/#windows>
- Launch the Jupyter notebook script.
- You will need a few packages that might not come already installed. You can install these easily within your computer's terminal.

- If you are using a Mac, type the following (followed by an enter command) in your command terminal.

```
pip install setuptools
pip install msgpack
pip install qgrid
jupyter nbextension enable --py --sys-prefix qgrid
jupyter nbextension enable --py --sys-prefix widgetsnbextension
pip install jupyterlab
jupyter labextension install @jupyter-widgets/jupyterlab-manager
jupyter labextension install qgrid
```

- If you are using a Windows environment, download the packages through the Anaconda interphase by navigating to the Environments tab within the Anaconda Navigator. The extensions must then be enabled via the Anaconda Prompt terminal.

```
jupyter nbextension enable --py --sys-prefix qgrid
jupyter nbextension enable --py --sys-prefix widgetsnbextension
pip install
```

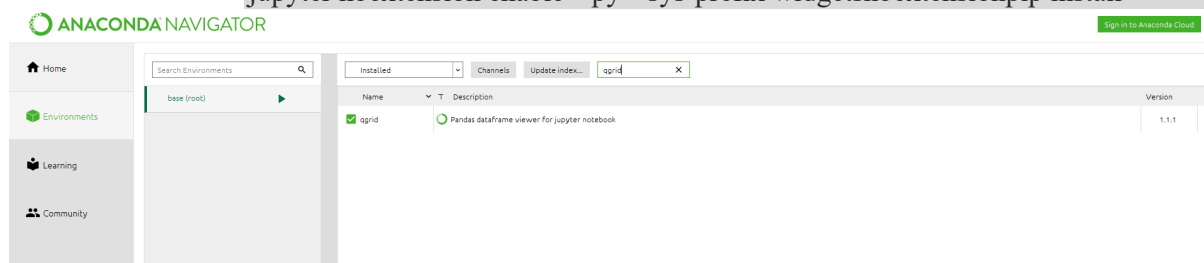

- Next, load the jupyter notebook from the Anaconda Prompt terminal.
- Now, you are ready to start analysing the fault scarp profiles.
- With the Jupyter Notebook up and running, make sure that the working directory is set to the location of the folder that contains the csv file. You can check this by typing 'ls' and entering the command. If it is not, you can navigate to that folder by typing 'cd "subfolder in current location"'. Or by typing 'cd ..' to step back one folder level.
- If you used the QGIS version of the data extraction process, then you will first need to separate your CSV file into separate files with one for each profile. The first step of the Python notebook will do this for you.
  - You will need to create a file structure similar to this one:
    - Folder Name: Profiles
    - Subfolder Name: Raw
    - SubSubFolder Name: Transect 1
    - The original CSV file with the data you exported from QGIS



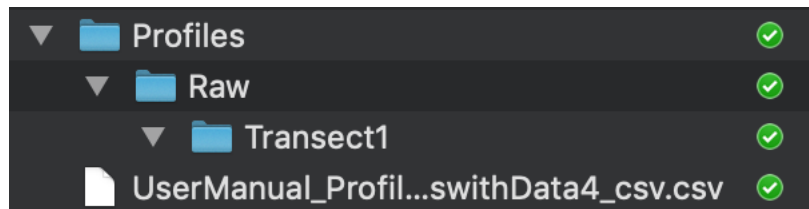

- After running this portion of the notebook, you should see individual profiles in the Raw folder.

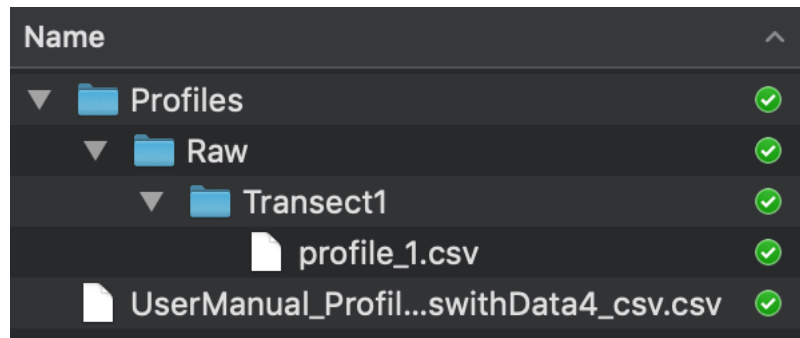

- If you used the ArcGIS version, your files should already be separated into their individual profiles.
- It is likely that the headers of your CSV will not be the same as those used in the development test case. Thus, you will need to manually change the header names in this tab so that the notebook will read in the data correctly.

```
data = pd.read_csv(my_dir + folder + my_transect + profile)
data = data.rename(index=str, columns={"Unnamed: 0": "Point", "PointID": "Point", "ProfID": "Profile Number", "id": "Profile Num",
                                     "distance": "Distance", "MAPNAME": "Map Name", "Geology": "Map Name",
                                     "ABSMIN_MA": "Minimum Age (MA)", "Age_Min": "Minimum Age (MA)",
                                     "ABSMAX_MA": "Maximum Age (MA)", "Age_Max": "Maximum Age (MA)",
                                     "rvalue_1": "Elevation"})

# Call all the widget
qgrid_widget = qgrid.show_grid(data, show_toolbar=True)
qgrid_widget

hide_toggle()
```

- Running the next set of commands will launch the data manipulation widgets and display your first profile.

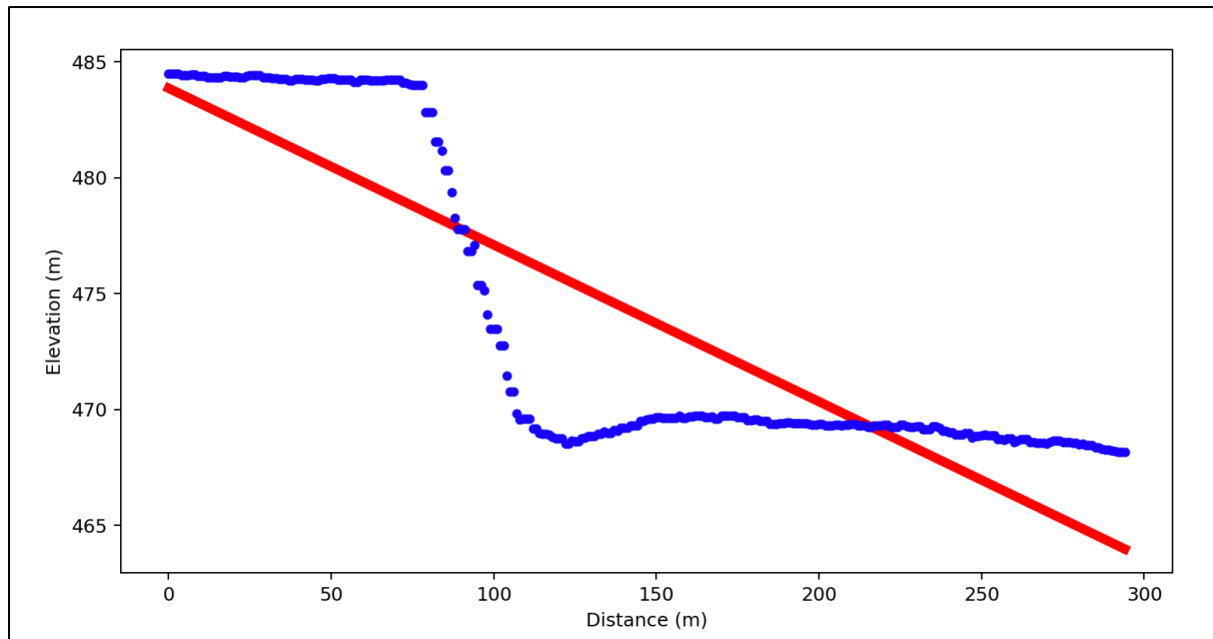

- By running the following command box, you will launch an interactive data table. Manipulate and filter the data to fit the red line to the surface you believe represents the footwall. You can do this by clicking the filter button at the top of each column and then sliding the bar to only contain data within the range you would like to view. The red line should update in accordance with the subset of data that remains in the data frame.
- Sometimes, the interactive table and subsequent line of best fit created from the subset of data selected can be buggy. Often times, it was necessary to chose a subset of data with the sliders and then re-load the graph above. Then it would allow the user to interactively update the polyline choice in real time.
- This is only necessary on the first profile when launching the notebook to get the widget started. Then it should work cleanly throughout the analysis.

Figure 1

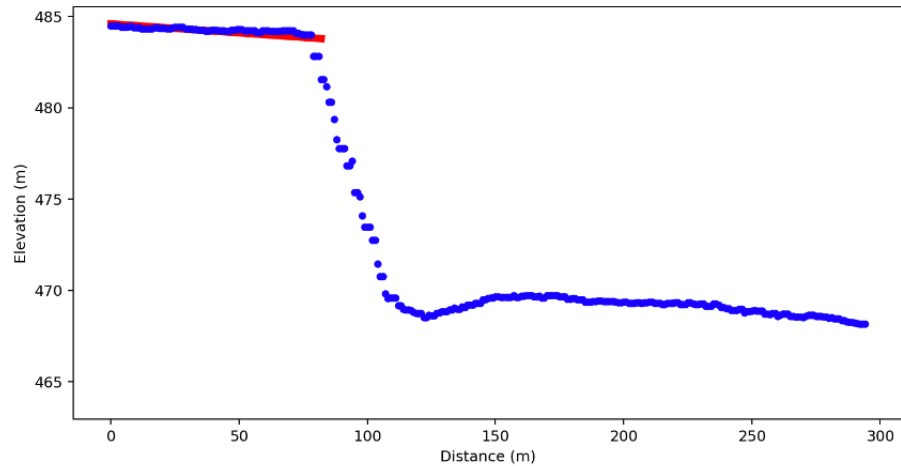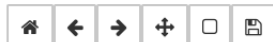

Out[15]: [Toggle show/hide](#)

Launch the interactive sliders to filter the data for fault components.

In [16]: `# Here you will launch the data filtering sliders  
qgrid_widget`

| Add Row |       | Remove Row  |          |                                                                             |           |           |           |  |  |
|---------|-------|-------------|----------|-----------------------------------------------------------------------------|-----------|-----------|-----------|--|--|
| index   | Point | Profile Num | Distance | Map Name                                                                    | Minimum A | Maximum A | Elevation |  |  |
| 0       | 0     | 1           | 0        | Filter by Distance <input type="text" value="0.00000 - 82.32000"/><br>Reset | 0.062     | 0.062     | 484.5     |  |  |
| 1       | 1     | 1           | 1        |                                                                             | 0.062     | 0.062     | 484.5     |  |  |
| 2       | 2     | 1           | 2        |                                                                             | 0.062     | 0.062     | 484.48999 |  |  |
| 3       | 3     | 1           | 3        |                                                                             | 0.062     | 0.062     | 484.48999 |  |  |
| 4       | 4     | 1           | 4        |                                                                             | 0.062     | 0.062     | 484.42667 |  |  |
| 5       | 5     | 1           | 5        | Earthquake...                                                               | 0.06      | 0.062     | 484.4119  |  |  |
| 6       | 6     | 1           | 6        | Earthquake...                                                               | 0.06      | 0.062     | 484.4119  |  |  |
| 7       | 7     | 1           | 7        | Earthquake...                                                               | 0.06      | 0.062     | 484.45001 |  |  |
| 8       | 8     | 1           | 8        | Earthquake...                                                               | 0.06      | 0.062     | 484.45001 |  |  |
| 9       | 9     | 1           | 9        | Earthquake...                                                               | 0.06      | 0.062     | 484.375   |  |  |
| 10      | 10    | 1           | 10       | Earthquake...                                                               | 0.06      | 0.062     | 484.375   |  |  |
| 11      | 11    | 1           | 11       | Earthquake...                                                               | 0.06      | 0.062     | 484.375   |  |  |
| 12      | 12    | 1           | 12       | Earthquake...                                                               | 0.06      | 0.062     | 484.31    |  |  |

- Once you have made your selection, run the box that saves the data within the FW variable. It is important to not run the HW and SC boxes until you have completed a similar process for each.

Save values for each component of the fault scarp

In [17]: `# Save the data points for the FW  
FW = qgrid_widget.get_changed_df()[['Distance', 'Elevation']]`

In [18]: `# Save the data points for the HW  
HW = qgrid_widget.get_changed_df()[['Distance', 'Elevation']]`

In [18]: `# Save the data points for the SC  
SC = qgrid_widget.get_changed_df()[['Distance', 'Elevation']]  
#SC.dropna(axis=1);`

- Next, re-filter the data within the interactive data frame so that the red line fits the hanging wall surface. You can remove you previous filtered selection by clicking the filter button on the row and then selecting reset.

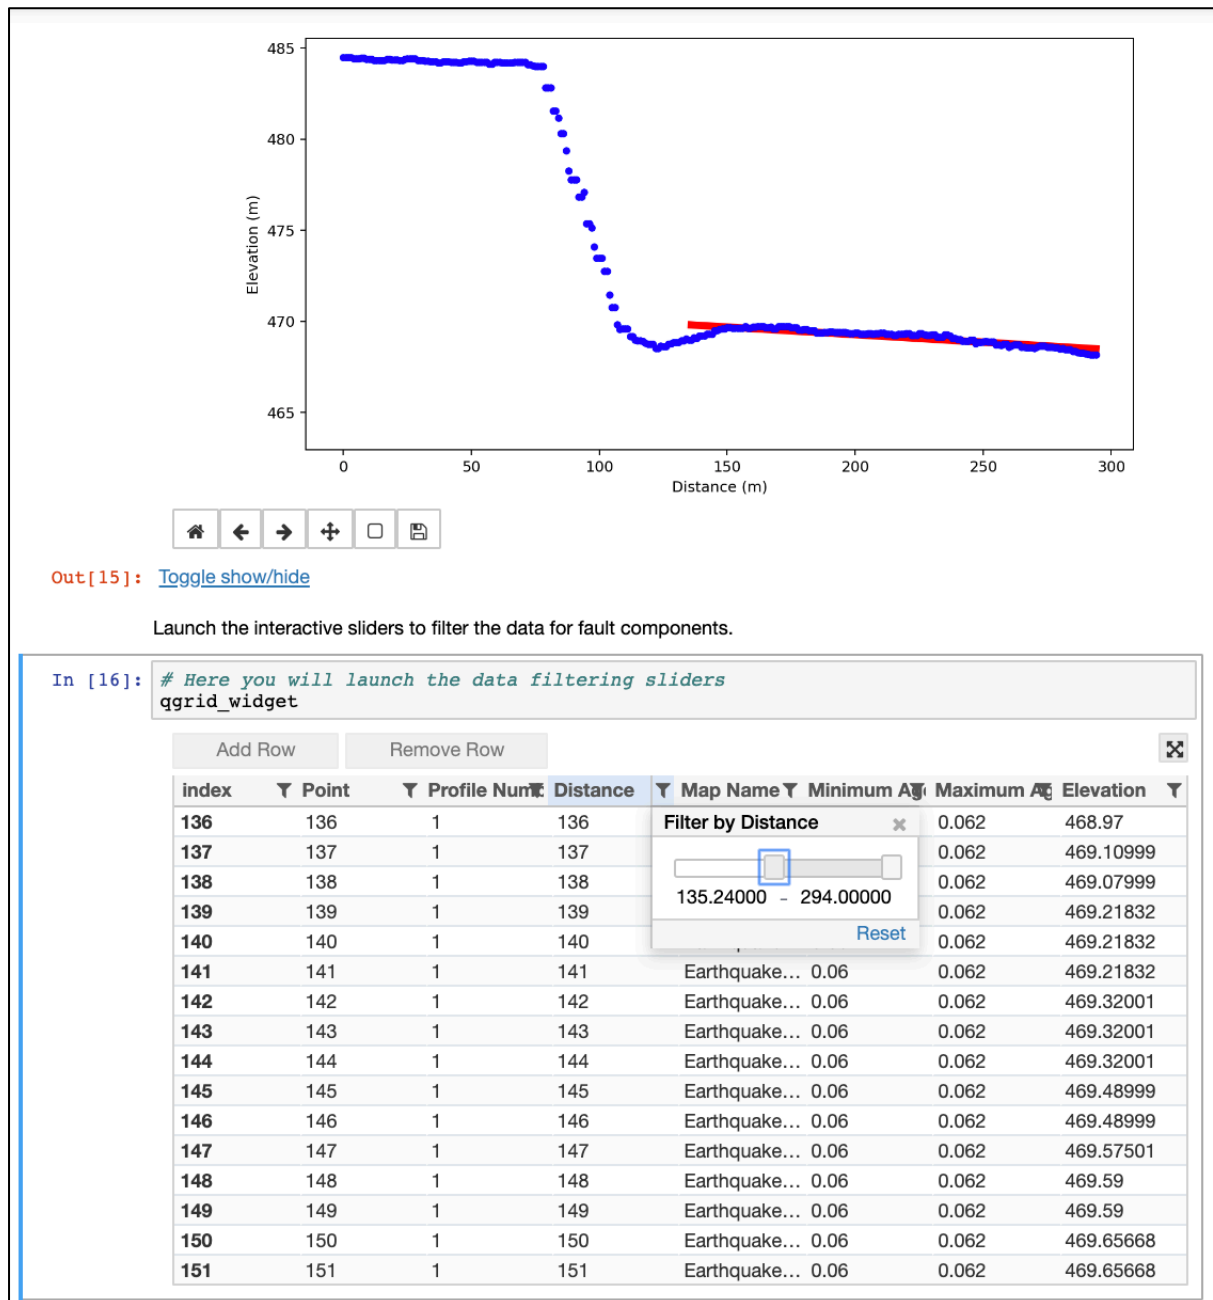

- Now run the HW box to save this data as the HW variable, just as was completed for the FW.
- Do the same for the Scarp.

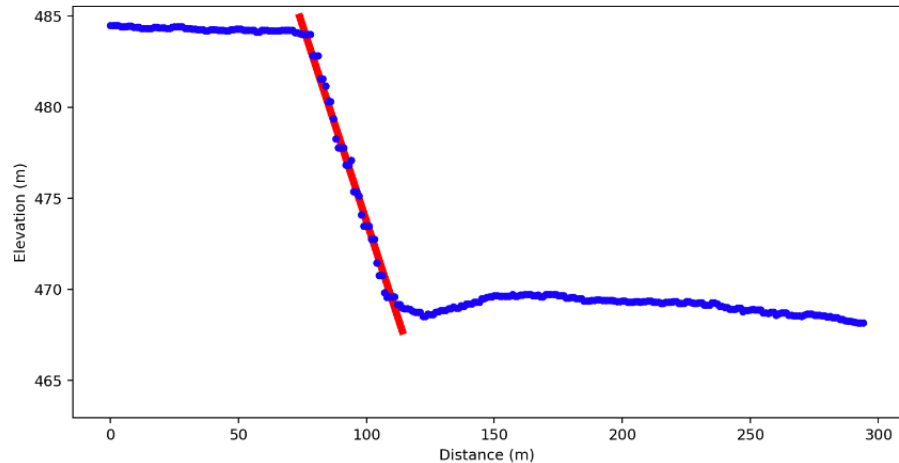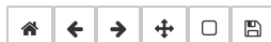

Out[15]: [Toggle show/hide](#)

Launch the interactive sliders to filter the data for fault components.

In [16]: `# Here you will launch the data filtering sliders  
qgrid_widget`

| Add Row |       | Remove Row  |          |                    |                      |           |           |  |  |
|---------|-------|-------------|----------|--------------------|----------------------|-----------|-----------|--|--|
| index   | Point | Profile Num | Distance | Map Name           | Minimum A            | Maximum A | Elevation |  |  |
| 96      | 96    | 1           | 96       | Filter by Distance | 73.50000 - 114.66000 | 0.062     | 475.35999 |  |  |
| 97      | 97    | 1           | 97       |                    |                      | 0.062     | 475.12717 |  |  |
| 98      | 98    | 1           | 98       |                    |                      | 0.062     | 474.08936 |  |  |
| 99      | 99    | 1           | 99       |                    |                      | 0.062     | 473.47815 |  |  |
| 100     | 100   | 1           | 100      | Earthquake...      | 0.06                 | 0.062     | 473.47815 |  |  |
| 101     | 101   | 1           | 101      |                    |                      | 0.062     | 473.47815 |  |  |
| 102     | 102   | 1           | 102      |                    |                      | 0.062     | 472.76035 |  |  |
| 103     | 103   | 1           | 103      |                    |                      | 0.062     | 472.76035 |  |  |
| 104     | 104   | 1           | 104      |                    |                      | 0.062     | 471.44379 |  |  |
| 105     | 105   | 1           | 105      |                    |                      | 0.062     | 470.79053 |  |  |
| 106     | 106   | 1           | 106      |                    |                      | 0.062     | 470.79053 |  |  |
| 107     | 107   | 1           | 107      |                    |                      | 0.062     | 469.815   |  |  |
| 108     | 108   | 1           | 108      |                    |                      | 0.062     | 469.57001 |  |  |
| 109     | 109   | 1           | 109      |                    |                      | 0.062     | 469.59    |  |  |
| 110     | 110   | 1           | 110      |                    |                      | 0.062     | 469.59    |  |  |
| 111     | 111   | 1           | 111      |                    |                      | 0.062     | 469.59    |  |  |

- Run the SC box.
- Next, the GUI will allow you to visualize your choices while displaying the original data. If you do not like your choices, you can do the previous process again and re-save new data as you see fit.

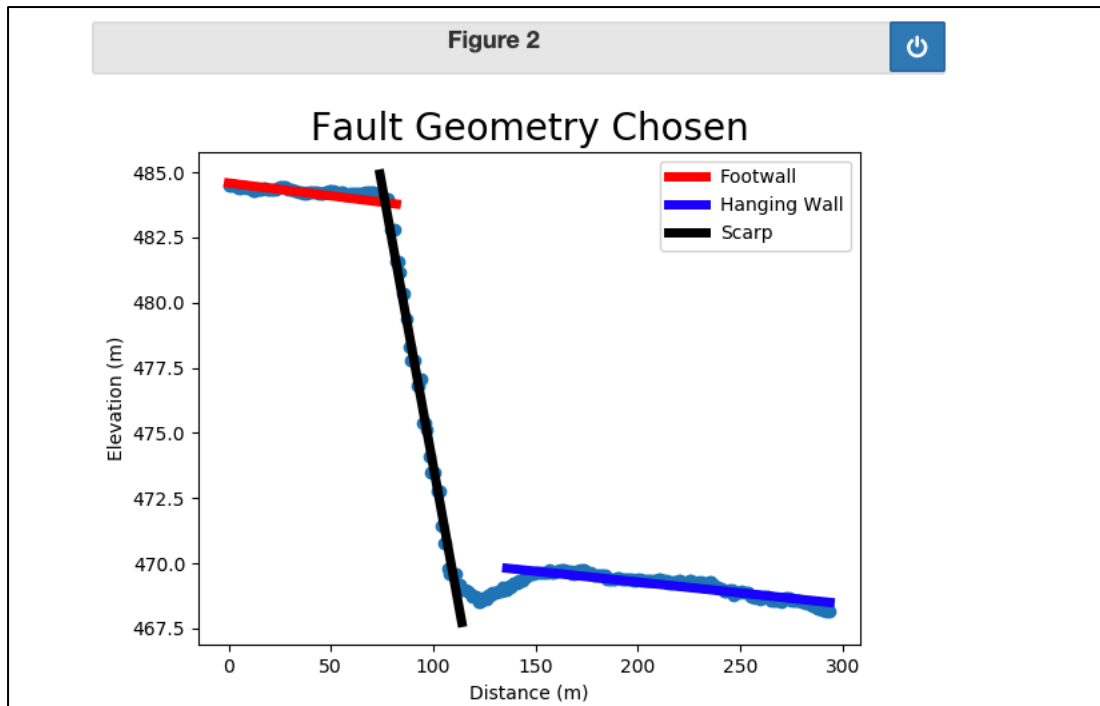

- This is a simplified representation of the fault profile broken down into its three components (HW, FW, and SC) based on the selections you have chosen. If you like the selection, run the next box to save the file. The script will save the new filtered data as a separate file and also save a JPG image of this fault geometry to keep for your records.
- The file will be saved within the same folder, but will have the title 'processed' in front. The script will create the processed folder for you if it does not already exist.
- You should now have the following files:

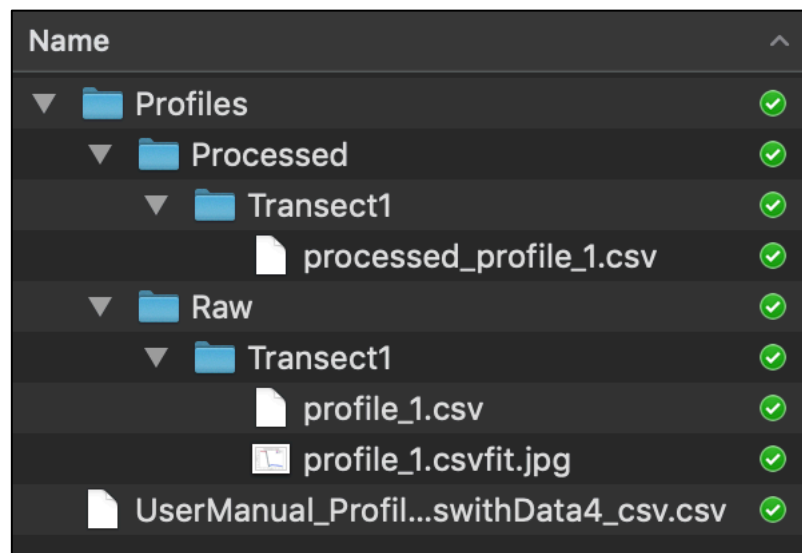

- Now you are ready to load in the next fault scarp profile and complete the process over again.

## Monte Carlo Slip Statistics Calculation

Now that you have processed all of the fault profiles, the jupyter notebook can calculate all of the slip statistics at once in a batch process. Running this process multiple times will just rewrite the output files for each individual profile, so it does not matter whether you run this step last or throughout. There are plots created for each profile, as well as a summary table with the statistics for each.

- The first box will allow you to set up a fault geometry distribution.
- You can set the dip of the fault and the position of the fault's intersection with the scarp

Toggle this cell on if you would like to change the fault geometry, number of samples, or directory of your transect profiles. The directory should contain the folders of transects that contain the individual fault profile geometries. Run this cell to initialize these values.

```
# Create table to contain fault components
# Fault is arranged as follows:
# Row 1: Dip mean, Dip deviation, Position mean, Position deviation
# Row 2: Dip min, max1, max2, end (trapezoidal distribution of dips)
# Row 3: Position min, max1, max2, end
# If trapezoidal distribution is goal, use rows 2 and 3
Fault = [[0,0,0,0],[60,70,80,90],[0,0,0.50,0.10]]

# Number of samples for Monte Carlo simulations
nsamples = 10000

# Define directory for inputs and outputs
my_dir = processed_folder_path

hide_toggle()
```

- Running the next box will calculate the statistics for each fault profile.

## Outputs

- The output of the code will include slip statistics and histograms of slip statistics for visualization. These will also be saved as individual files in a new folder the script creates called Outputs.

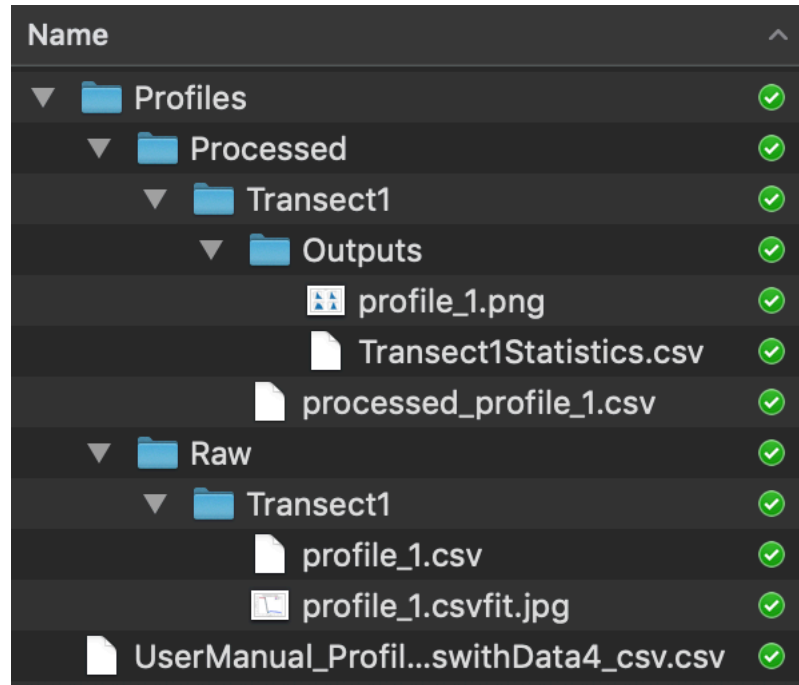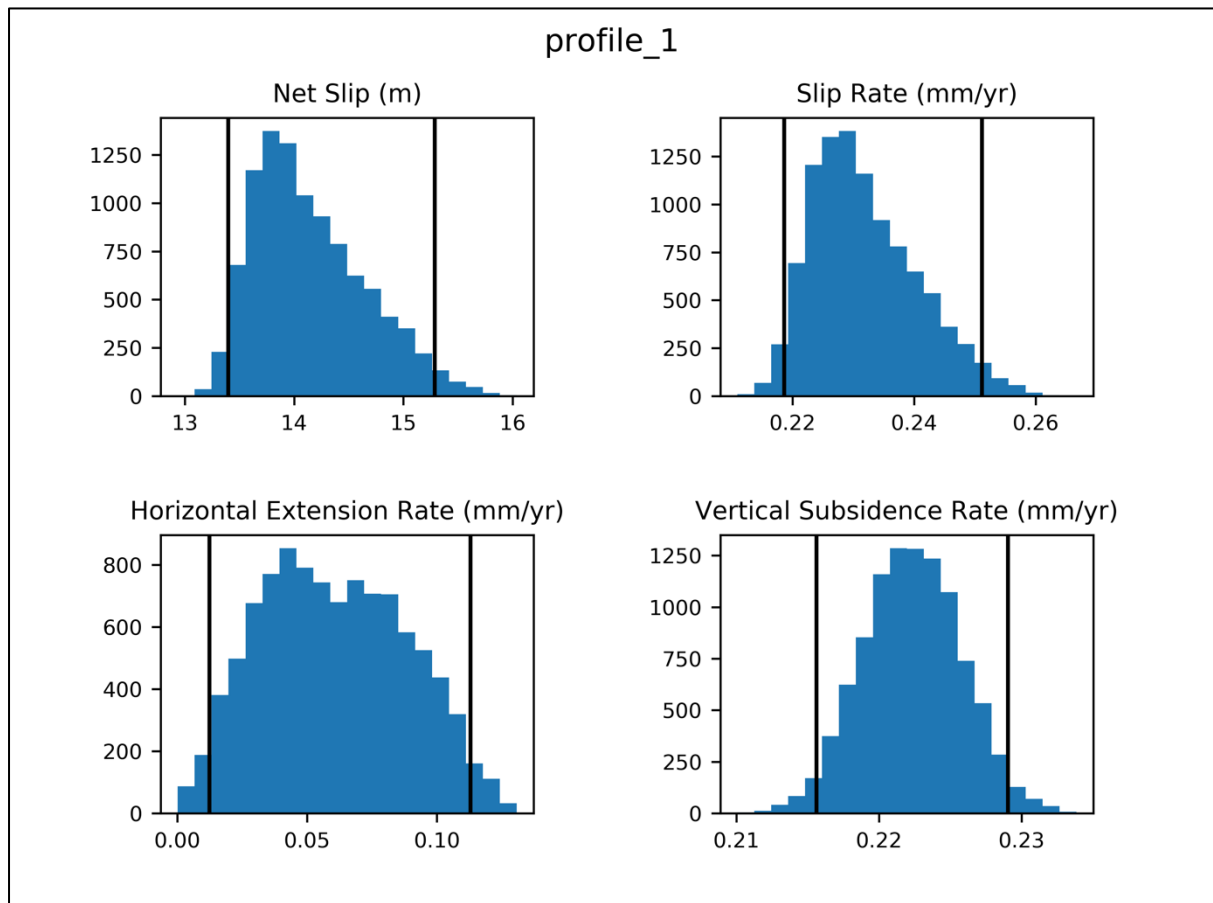



Transect1

|                                     | profile_1 | Cumulative |
|-------------------------------------|-----------|------------|
| Slip Mean (m)                       | 14.15     | 14.15      |
| Slip Median (m)                     | 14.05     | 14.05      |
| Slip Min (m)                        | 13.40     | 13.4       |
| Slip Max (m)                        | 15.29     | 15.29      |
| Slip 2STD (m)                       | 1.02      | 1.02       |
| Slip Rate Mean (mm/yr)              | 0.23      | 0.23       |
| Slip Rate Median (mm/yr)            | 0.23      | 0.23       |
| Slip Rate Min (mm/yr)               | 0.22      | 0.22       |
| Slip Rate Max (mm/yr)               | 0.25      | 0.25       |
| Slip Rate 2STD (mm/yr)              | 0.02      | 0.02       |
| Slip Rate Horizontal Mean (mm/yr)   | 0.06      | 0.06       |
| Slip Rate Horizontal Median (mm/yr) | 0.06      | 0.06       |
| Slip Rate Horizontal Min (mm/yr)    | 0.01      | 0.01       |
| Slip Rate Horizontal Max (mm/yr)    | 0.11      | 0.11       |
| Slip Rate Horizontal 2STD (mm/yr)   | 0.06      | 0.06       |
| Slip Rate Vertical Mean (mm/yr)     | 0.22      | 0.22       |
| Slip Rate Vertical Median (mm/yr)   | 0.22      | 0.22       |
| Slip Rate Vertical Min (mm/yr)      | 0.22      | 0.22       |
| Slip Rate Vertical Max (mm/yr)      | 0.23      | 0.23       |
| Slip Rate Vertical 2STD (mm/yr)     | 0.01      | 0.01       |
| Age Min (Ma)                        | 0.06      | N/A        |
| Age Max (Ma)                        | 0.06      | N/A        |

time = 1.1865930557250977 seconds

## Data Display in GIS

### a) QGIS

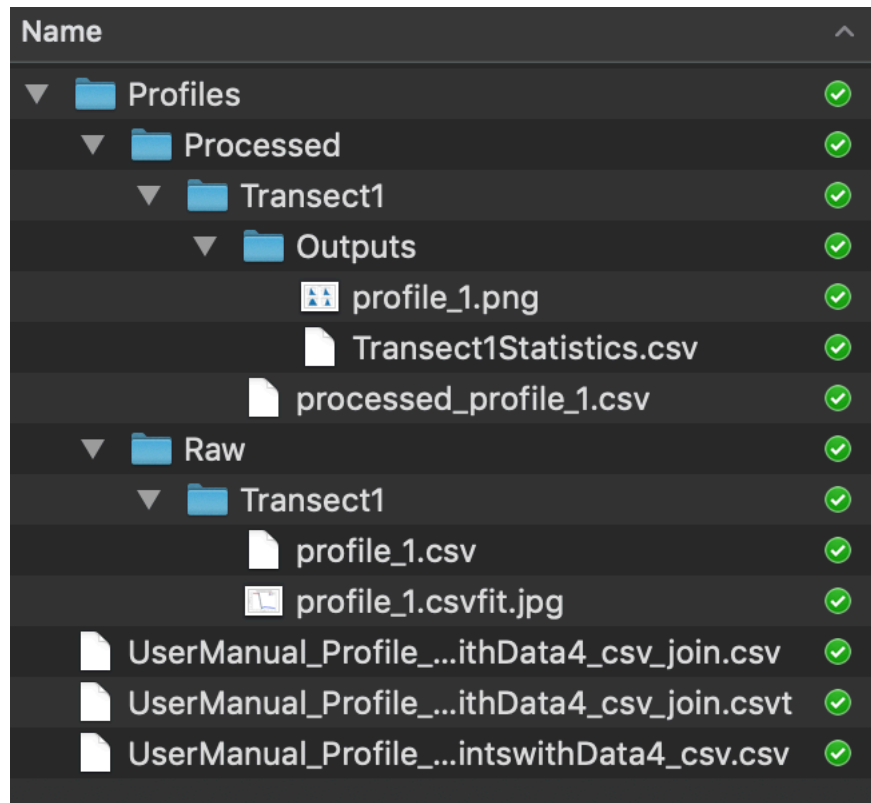

- To display in QGIS and associate these statistics with the original profiles, we will use the Join Fields tool.
- Load your CSV where the final part of the file name is “\_join” into QGIS.
- Open the Properties of the original Shapefile and navigate to the Joins tab.
- Click the “+” sign to add a new Join.
- Select your csv file with the extension “\_join” as the Join Layer.
- Select the ID fields of the Join Layer and the Shapefile layer as the Join Field and Target Field.
- Hit OK and then Apply.

**Add Vector Join**

Join layer: UserManual\_Profile\_PointswithData4\_csv\_join

Join field: abc field\_1

Target field: 123 id

☒ Cache join layer in virtual memory

☐ Create attribute index on join field

☐ Dynamic form

▶ ☐ Editable join layer

▶ ☐ Joined Fields

▶ ☐ Custom Field Name Prefix

Cancel OK

- Now open your Attribute Table and the datasets should be joined.

UserManual\_Profile\_Test :: Features Total: 1, Filtered: 1, Selected: 1

|   | id | 'ointswithData4_c' | 'ointswithData4_cs' | PointswithData4_x | PointswithData4_c | 'ointswithData4_c' | withData4_csv_jo | withData4_csv_jo | withData4_csv_jc | withData4_csv_jc | withData4 |
|---|----|--------------------|---------------------|-------------------|-------------------|--------------------|------------------|------------------|------------------|------------------|-----------|
| 1 | 1  | 14.14              | 14.05               | 13.39             | 15.29             | 1.0                | 0.23             | 0.23             | 0.22             | 0.25             | 0.02      |

## b) ArcGIS

A toolbox was created to make attaching statistics to the original profiles seamless.

- Launch the tool titled, “attachStats2Profiles”
- Enter the required dialogue boxes including the full file path for the Stats CSV file

attachStats2Profiles

Profile layer

profiles\_EqFlatFormationCopy

Profile ID field

id

Stats CSV file

C:\Users\frw313\Google Drive\GNS\WolfeStahl2019\MCSST2019\Output From Code\Transect2Statistics.csv

Stats CSV file

CSV file with statistics calculated for profile lines

OK

Cancel

Environments...

<< Hide Help

Tool Help

- The statistics from the CSV file should now be attached to the profiles originally digitized in ArcGIS
- Alternatively, the Python standalone script can be used. This will require manual entry to the full data file paths.

| FID | Shape       | id | SMedian | SMin  | SMax  | S2STD | SRMean | SRMedian | SRMin | SRMax | SR2STD | SRHMean | SRHMedian | SRHMin | SRHMax | SRH2STD | SRVMean | SRVMedian | SRVMin | SRVMax | SRV |
|-----|-------------|----|---------|-------|-------|-------|--------|----------|-------|-------|--------|---------|-----------|--------|--------|---------|---------|-----------|--------|--------|-----|
| 0   | Polyline ZM | 1  | 28.45   | 26.44 | 30.68 | 2.16  | 0.47   | 0.47     | 0.43  | 0.5   | 0.04   | 0.12    | 0.12      | 0.03   | 0.22   | 0.11    | 0.45    | 0.45      | 0.42   | 0.48   |     |
| 1   | Polyline ZM | 2  | 34.87   | 33.21 | 37.27 | 2.07  | 0.57   | 0.57     | 0.54  | 0.61  | 0.04   | 0.15    | 0.15      | 0.03   | 0.27   | 0.13    | 0.55    | 0.55      | 0.52   | 0.58   |     |
| 2   | Polyline ZM | 3  | 16.22   | 14.13 | 18.44 | 2.18  | 0.27   | 0.27     | 0.23  | 0.3   | 0.04   | 0.07    | 0.07      | 0.01   | 0.13   | 0.06    | 0.26    | 0.26      | 0.22   | 0.29   |     |
| 3   | Polyline ZM | 5  | 14.97   | 12.76 | 17.25 | 2.29  | 0.25   | 0.25     | 0.21  | 0.28  | 0.04   | 0.06    | 0.06      | 0.01   | 0.12   | 0.06    | 0.24    | 0.24      | 0.2    | 0.27   |     |
| 4   | Polyline ZM | 6  | 20.89   | 18.94 | 23.54 | 2.36  | 0.34   | 0.34     | 0.31  | 0.39  | 0.04   | 0.09    | 0.09      | 0.02   | 0.17   | 0.08    | 0.33    | 0.33      | 0.3    | 0.36   |     |
| 5   | Polyline ZM | 7  | 16.37   | 13.91 | 18.98 | 2.57  | 0.27   | 0.27     | 0.23  | 0.31  | 0.04   | 0.07    | 0.07      | 0.01   | 0.13   | 0.06    | 0.26    | 0.26      | 0.22   | 0.29   |     |
| 6   | Polyline ZM | 4  | 22.83   | 18.29 | 27.81 | 4.87  | 0.37   | 0.37     | 0.3   | 0.46  | 0.08   | 0.1     | 0.09      | 0.02   | 0.19   | 0.09    | 0.36    | 0.36      | 0.29   | 0.43   |     |
| 7   | Polyline ZM | 9  | 13.72   | 13.19 | 14.91 | 0.94  | 0.23   | 0.23     | 0.21  | 0.24  | 0.02   | 0.06    | 0.06      | 0.01   | 0.11   | 0.05    | 0.22    | 0.22      | 0.21   | 0.22   |     |
| 8   | Polyline ZM | 8  | 34.47   | 32.71 | 37.06 | 2.23  | 0.57   | 0.57     | 0.53  | 0.61  | 0.04   | 0.15    | 0.15      | 0.03   | 0.27   | 0.13    | 0.54    | 0.54      | 0.52   | 0.57   |     |
| 9   | Polyline ZM | 10 | 23.65   | 20.49 | 27.12 | 3.37  | 0.39   | 0.39     | 0.34  | 0.44  | 0.06   | 0.1     | 0.1       | 0.02   | 0.19   | 0.09    | 0.37    | 0.37      | 0.33   | 0.42   |     |
| 10  | Polyline ZM | 11 | 10.53   | 5.7   | 15.65 | 5.18  | 0.17   | 0.17     | 0.09  | 0.26  | 0.08   | 0.04    | 0.04      | 0.01   | 0.1    | 0.05    | 0.17    | 0.17      | 0.09   | 0.25   |     |
| 11  | Polyline ZM | 12 | 11.42   | 4.51  | 18.5  | 7.15  | 0.19   | 0.19     | 0.07  | 0.3   | 0.12   | 0.05    | 0.04      | 0.01   | 0.11   | 0.06    | 0.18    | 0.18      | 0.07   | 0.29   |     |
| 12  | Polyline ZM | 13 | 12.18   | 11.48 | 13.25 | 0.91  | 0.2    | 0.2      | 0.19  | 0.22  | 0.02   | 0.05    | 0.05      | 0.01   | 0.1    | 0.05    | 0.19    | 0.19      | 0.18   | 0.2    |     |
| 13  | Polyline ZM | 14 | 24.24   | 17.83 | 30.71 | 6.65  | 0.4    | 0.4      | 0.29  | 0.5   | 0.11   | 0.1     | 0.1       | 0.02   | 0.2    | 0.1     | 0.38    | 0.38      | 0.28   | 0.48   |     |
| 14  | Polyline ZM | 15 | 23.75   | 22.24 | 25.56 | 1.68  | 0.39   | 0.39     | 0.36  | 0.42  | 0.03   | 0.1     | 0.1       | 0.02   | 0.19   | 0.09    | 0.37    | 0.37      | 0.35   | 0.4    |     |
| 15  | Polyline ZM | 16 | 15.12   | 14.29 | 16.44 | 1.11  | 0.25   | 0.25     | 0.23  | 0.27  | 0.02   | 0.06    | 0.06      | 0.01   | 0.12   | 0.06    | 0.24    | 0.24      | 0.23   | 0.25   |     |
| 16  | Polyline ZM | 17 | 14.07   | 12.01 | 16.23 | 2.13  | 0.23   | 0.23     | 0.2   | 0.27  | 0.04   | 0.06    | 0.06      | 0.01   | 0.11   | 0.05    | 0.22    | 0.22      | 0.19   | 0.25   |     |
| 17  | Polyline ZM | 19 | 9.02    | 6.85  | 11.21 | 2.22  | 0.15   | 0.15     | 0.11  | 0.18  | 0.04   | 0.04    | 0.04      | 0.01   | 0.08   | 0.04    | 0.14    | 0.14      | 0.11   | 0.18   |     |
| 18  | Polyline ZM | 20 | 1.21    | 0.82  | 2.16  | 0.79  | 0.02   | 0.02     | 0.01  | 0.04  | 0.01   | 0.01    | 0         | 0      | 0.01   | 0.01    | 0.02    | 0.02      | 0.01   | 0.03   |     |
| 19  | Polyline ZM | 21 | 11.33   | 9.24  | 13.62 | 2.24  | 0.19   | 0.19     | 0.15  | 0.22  | 0.04   | 0.05    | 0.05      | 0.01   | 0.09   | 0.05    | 0.18    | 0.18      | 0.15   | 0.21   |     |
| 20  | Polyline ZM | 22 | 17.81   | 14.63 | 21.28 | 3.34  | 0.29   | 0.29     | 0.24  | 0.35  | 0.06   | 0.08    | 0.08      | 0.01   | 0.15   | 0.07    | 0.28    | 0.28      | 0.23   | 0.33   |     |
| 21  | Polyline ZM | 23 | 32.27   | 25.79 | 38.83 | 6.67  | 0.53   | 0.53     | 0.42  | 0.64  | 0.11   | 0.14    | 0.14      | 0.03   | 0.26   | 0.13    | 0.51    | 0.51      | 0.41   | 0.61   |     |
| 22  | Polyline ZM | 24 | 6.24    | 2.06  | 10.61 | 4.37  | 0.1    | 0.1      | 0.03  | 0.17  | 0.07   | 0.03    | 0.02      | 0      | 0.06   | 0.03    | 0.1     | 0.1       | 0.03   | 0.17   |     |
| 23  | Polyline ZM | 25 | 9.87    | 8.69  | 11.27 | 1.31  | 0.16   | 0.16     | 0.14  | 0.19  | 0.02   | 0.04    | 0.04      | 0.01   | 0.08   | 0.04    | 0.16    | 0.16      | 0.14   | 0.17   |     |
| 24  | Polyline ZM | 26 | 45.72   | 40.13 | 51.51 | 5.82  | 0.75   | 0.75     | 0.66  | 0.85  | 0.1    | 0.19    | 0.19      | 0.04   | 0.35   | 0.17    | 0.72    | 0.72      | 0.63   | 0.82   |     |
| 25  | Polyline ZM | 27 | 7.01    | 4.82  | 9.29  | 2.26  | 0.12   | 0.11     | 0.08  | 0.15  | 0.04   | 0.03    | 0.03      | 0.01   | 0.06   | 0.03    | 0.11    | 0.11      | 0.08   | 0.14   |     |
| 26  | Polyline ZM | 29 | 34.71   | 31.15 | 38.31 | 3.64  | 0.57   | 0.57     | 0.51  | 0.63  | 0.06   | 0.15    | 0.15      | 0.03   | 0.27   | 0.13    | 0.55    | 0.55      | 0.49   | 0.6    |     |
| 27  | Polyline ZM | 30 | 44.98   | 39.34 | 52.81 | 6.97  | 0.74   | 0.74     | 0.65  | 0.87  | 0.12   | 0.2     | 0.19      | 0.04   | 0.38   | 0.19    | 0.71    | 0.71      | 0.63   | 0.8    |     |
| 28  | Polyline ZM | 28 | 36.34   | 29.93 | 42.98 | 6.7   | 0.6    | 0.6      | 0.49  | 0.7   | 0.11   | 0.15    | 0.15      | 0.03   | 0.28   | 0.14    | 0.57    | 0.57      | 0.47   | 0.68   |     |
| 29  | Polyline ZM | 31 | 17.76   | 16.46 | 19.1  | 1.35  | 0.29   | 0.29     | 0.27  | 0.31  | 0.02   | 0.08    | 0.08      | 0.02   | 0.14   | 0.06    | 0.28    | 0.28      | 0.26   | 0.3    |     |
| 30  | Polyline ZM | 33 | 3.95    | 2.94  | 5.1   | 1.1   | 0.06   | 0.06     | 0.05  | 0.08  | 0.02   | 0.02    | 0.02      | 0      | 0.03   | 0.02    | 0.06    | 0.06      | 0.05   | 0.08   |     |
| 31  | Polyline ZM | 32 | 23.47   | 19.21 | 27.81 | 4.37  | 0.38   | 0.38     | 0.31  | 0.46  | 0.07   | 0.1     | 0.1       | 0.02   | 0.18   | 0.09    | 0.37    | 0.37      | 0.3    | 0.44   |     |
| 32  | Polyline ZM | 34 | 10.27   | 5.66  | 14.47 | 4.46  | 0.17   | 0.17     | 0.09  | 0.24  | 0.07   | 0.04    | 0.04      | 0.01   | 0.09   | 0.04    | 0.16    | 0.16      | 0.09   | 0.23   |     |
