# Supplementary material for: Short communication: A semi-automated method for rapid fault slip analysis from topographic scarp profiles
Source: Copernicus journal article supplement (doi:10.5194/esurf-2019-53), 2019-10-15
Supplement: Supplementary file [file esurf-2019-53-RC1-supplement.pdf]

# A semi-automated method for rapid fault slip analysis from topographic scarp profiles

Franklin D. Wolfe<sup>1</sup>, Timothy A. Stahl<sup>2</sup>, Pilar Villamor<sup>3</sup>, and Biljana Lukovic<sup>3</sup>

<sup>1</sup>Earth and Planetary Sciences, Harvard University, Cambridge, 02143, USA

<sup>2</sup>College of Science, University of Canterbury, Christchurch, 8041, NZ

<sup>3</sup>GNS Science, Lower Hutt, 5040, NZ

**Correspondence:** Franklin D. Wolfe (wolfe\_franklin@g.harvard.edu)

**Abstract.** Here, we introduce an open source, semi-automated, Python-based graphical user interface (GUI) called the Monte Carlo Slip Statistics Toolkit (MCSST) for estimating dip slip on individual or bulk fault datasets. Using this toolkit, profiles are defined across fault scarps in high-resolution digital elevation models (DEMs) and then relevant fault scarp components are interactively identified (e.g., footwall, hanging wall, and scarp). Displacement statistics are calculated automatically using Monte Carlo simulation (Thompson et al., 2002) and can be conveniently visualized in Geographic Information Systems (GIS) for spatial analysis. Fault slip rates can also be calculated when ages of footwall and hanging wall surfaces are known, allowing for temporal analysis. This method allows for rapid analysis of tens to hundreds of faults in rapid succession within GIS and a Python coding environment. Application of this method may contribute to a wide range of regional and local earthquake geology studies with adequate high-resolution DEM coverage, both regional fault source characterization for seismic hazard and/or estimating geologic slip and strain rates, including creating long-term deformation maps. ArcGIS versions of these functions are available, as well ones that utilize free, open source Quantum GIS (QGIS) and Jupyter Notebook Python software.

*Copyright statement.* TEXT

## 1 Introduction

The field of tectonic geomorphology is increasingly employing computer-based algorithms for displaying and analyzing digital topographic data (Whittaker et al., 2008; Kirby and Whipple, 2012; Zhou et al., 2015; Whipple et al., 2016). As a result, broad scale tectonic geomorphology toolboxes for automated high-level stream channel analysis and landscape evolution have been rapidly evolving [e.g., TopoToolbox, Topographic Analysis Kit (TAK), Stream Channel and Floodplain Metric Toolbox, etc.] (Whipple et al., 2007; Schwanghart and Scherler, 2014; Hopkins et al., 2018; Forte and Whipple, 2019). Several relatively complete and distinct sets of computational tools and libraries also exist for completing an array of complex topographic and fault zone analysis at the outcrop scale [e.g., SPARTA, Structure-from-Motion, etc.] (Westoby et al., 2012; Bemis et al., 2014; Hodge et al., 2019).

This is important because fault zones can be extraordinarily complex and require a method for systematically estimating net slip and slip rates across them (Fossen and Rotevatn, 2016). Where original landform geometries are known or can be inferred, fault scarp profiles from GPS surveys or transects across high-resolution digital elevation models (DEMs) can be used to characterize components of fault slip (DeLong et al., 2010; Spencer, 2010; Klimczak et al., 2018). The deformation within these fault zones can be spatially and temporally variable, thus motivating the analysis of large numbers of faults over broad areas (Wallace, 1977; Avouac, 1993; Villamor and Berryman, 2001; Personius et al., 2017; Pérouse and Wernicke, 2017). In most cases, where along-strike variability in slip and/or slip rate are observed, multiple measurements from the same fault are required just to delineate the slip history of one feature.

When Light Detection and Ranging (LiDAR) data have adequate resolution, the images can be used to identify submeter-scale geomorphic features from a workstation. Currently, this is done by analyzing individual profiles across fault scarps, manually picking fault components on distance vs. elevation plots, calculating statistics and regressions for each, and then running unique analyses for each profile, which is both tedious and time consuming.

In this paper we introduce a new Python-based graphical user interface (GUI), The Monte Carlo Slip Statistics Toolkit (MC-SST), that streamlines and improves on the approach for calculating slip statistics from fault scarps present in high-resolution digital elevation models (DEMs). We describe the basic functionality of MCSST and provide a representative example of the potential utility of this approach for selecting and analyzing fault scarps across a 25 km-wide transect. Using this approach, hundreds of profiles can be analyzed in a few hours, allowing for efficient analysis of spatial and temporal patterns of deformation. The methodology also allows for easy visualization of slip statistics on the original fault profiles in GIS so that spatial patterns of fault slip can be identified and anomalous values quickly identified and interrogated. A detailed user manual that lays out step-by-step usage of these tools and discusses how the underlying functions and algorithms work is included as a supplement and within the code repository.

## 2 Background

The concept and mathematics behind using a Monte Carlo approach to calculating dip slips were developed by Thompson et al. (2002). The motivation behind using this approach is that it accounts for uncertainty in key parameters required for calculating slip from structural data and topographic profile (Fig. 1). Regression statistics are calculated for lines fit to each of the hanging wall, scarp, and footwall. Each line has a mean value of slope and y-intercept, with 95 percent confidence intervals for each variable, and can thus be modelled as a normal distribution. The fault dip can be modelled as any type of distribution depending on how well constrained the values are. For example, if fault dips can be measured in adjacent outcrops, it may be most appropriate to model the value as a normal distribution with a mean and 95 percent confidence interval; if dip is constrained only by regional fault geometry data, the user may choose a uniform or trapezoidal distribution to reflect the additional epistemic uncertainty. In the simplest case, the only other parameter required to calculate dip slip is the location of the fault projected up to the scarp.

This approach has been widely used on dip slip faults around the world (Thompson et al., 2002; Amos et al., 2010; Rood et al., 2011; Stahl et al., 2016; Stahl and Niemi, 2017). Thompson et al. (2002) first used their method to quantify slip rate variability in a transect across the Kyrgyzstan Tian Shan. Amos et al. (2010) showed that it could be used to identify previously unrecognized offsets along the Kern Canyon fault in east-central California, highlighting its role in accommodating internal deformation of the southern Sierra Nevada. Rood et al. (2011) analyzed a suite of geomorphic markers along the transition from the Sierra Nevada to the Eastern California Shear Zone-Walker Lane belt to reveal interactions among multiple faults. Stahl et al. (2016) used manually surveyed GPS profiles along the Fox Peak fault in New Zealand to demarcate segment boundaries based on slip rate. Stahl and Niemi (2017) compared manually surveyed fault scarps to geodetic estimates of strain in the Sevier Desert, Utah to discern a local magmatic versus far-field tectonic extension regime along the Wasatch Front. The broad interest in calculating slip statistics from fault scarps around the world, and the increasing access to high-resolution DEMs and powerful coding environments, motivates our development of a semi-automated toolkit for analyzing bulk fault datasets.

### 3 Principles of Design for MCSST

The primary goals of creating the MCSST are to (1) lower the barrier to entry for scientists by limiting the required knowledge of coding languages or general programming techniques; (2) allow the user to check for consistency and accuracy in their interpretations of fault components (e.g., fault scarp, hanging wall, and footwall) before proceeding with the slip statistics calculations; (3) optimize the functionality of GIS environments by combining previously created plugins when possible; (4) introduce a methodology for efficiently analyzing numerous fault scarps and delineating distributions of spatial and temporal patterns for slip statistics; and (5) provide open source software for those who do not have access to commercial products. We reference hanging wall and footwall throughout because this code was developed for use in a rift setting; however, upthrown and downthrown are equally viable terms considering the underlying math should be consistent for reverse faults as well.

MCSST was designed to leverage the power and broad code base of the open source QGIS plugin environment. It also utilizes the key data manipulation and visualization tools developed for comma-separated, value-file formats analyzed in the Jupyter Notebook Python coding environment. Free, open source applications, such as QGIS and Jupyter Notebook, provide increased access and functionality for scientific computing and displaying and analyzing spatial datasets. We also provide version compatible with ArcGIS, which is commonly used by academic institutions.

QGIS is a professional GIS application that runs on Linux, Unix, Mac OSX, Windows, and Android (Hugentobler, 2008). It is written in C++ supports numerous vectors, rasters, and database formats and functionalities and allows the user to visualize, manage, edit, and analyze data and compose printable maps. The scientific computing packages accessible within QGIS can be downloaded as plugins and used with internal graphical user interfaces (GUIs) or from a command line within the QGIS environment. They have been used for developing both desktop and web applications, facilitating complex scientific and numeric applications and improving data analysis and visualization (Bartolini et al., 2013; Westra, 2014; Tebano et al., 2017).

85 Jupyter Notebook is an open source web application developed through Project Jupyter, a non-profit organization that exists to develop open-source software, open-standards, and services for interactive computing across dozens of programming languages. QGIS and Jupyter Notebook both utilize the Python coding language.

## 4 Workflow

### 4.1 Define Fault Scarp Profiles in QGIS or ArcGIS

90 The user first defines profiles across fault scarps imaged in high-resolution digital elevation models. To do this within the QGIS environment, the user creates a new Shapefile Vector Layer. Within this layer, the user defines unique vector profiles across fault scarp imaged in the DEM. Each one of these profiles should correspond to a unique fault scarp that the user wants to interrogate. In this example, we consider that the fault has cut an originally planar geomorphic surface (e.g., an ignimbrite). Profiles are defined on a vertical plane normal to the structural trend of the fault.

### 95 4.2 Extract Data for Profiles

For each user-defined profile in Step 1, distance, elevation, and geologic age data are extracted at a user-defined spacing. A spacing of 1-5 meters has proven to be adequate in defining meter-scale features. Surface age can be provided by a Shapefile [in this case the New Zealand geological map, Leonard et al. (2010)]. Surfaces on either side of the fault can be different ages, which would result in minimum or maximum values when calculating net slip rates in Step 3. If geologic ages are not defined  
100 within the GIS environment, the user can manually generate these features with a few simple steps outlined in the user manual. To extract data, compiled plugins ‘Points Along Geometry’ and ‘Point Sampling Tool’ are utilized within QGIS. In the ArcGIS environment, the ArcGIS tool titled, ‘createProfileCSV’, or its companion standalone Python script, which were developed for this study, can be used to reproduce the same functionality.

### 4.3 Monte Carlo Slip Statistics Toolkit (MCSST)

105 Automated methods of extracting fault scarp components can be fraught with peril (Gallant and Hutchinson, 1997; Hilley et al., 2010; Stewart et al., 2018; Hodge et al., 2019). Mathematically identifying inflection points in a profile is often not adequate; however, recent algorithms, such as SPARTA, show promise (Hodge et al., 2019). Therefore, the input of a geologist is needed to analyze each fault scarp and our methodology makes this as easy as possible.

Within the Jupyter Notebook Python coding environment, the MCSST is used to analyze each profile. Profiles are loaded  
110 individually and then interactively displayed continuously to identify relevant fault components (e.g., footwall, hanging wall, and scarp) (Fig. 2). As opposed to identifying specific rows and columns of the CSV files, which is time consuming, the user uses sliders to choose relevant data points as shown in Figure 2b (e.g., the red line in Figure 2a was fit using the data selection shown in Figure 2b).



The choices are visualized in real-time as a regression line is automatically fit to the values within the modified data frame and displayed in the interactive plot (e.g., red line in Figure 2a fit to the footwall surface). The least squares linear regressions of these points in an x-y coordinate system determine the mean and standard error of both the slope and the intercept of the lines, which represent the hanging wall and footwall, where the tangent of the surface dip is the slope. This functionality improves greatly upon our previous method of analyzing individual profiles across fault scarps, manually picking fault components on distance vs. elevation plots (e.g., in Excel), and then exporting statistics and regressions individually to MATLAB.

#### 120 4.4 Check Your Selections

Though potentially subject to bias, picking fault scarp components requires human input (Gillespie et al., 1992; Zielke et al., 2015; Middleton et al., 2016; Hodge et al., 2019). Therefore, it is vital that users check each fault scarp component for accuracy. As shown in Figure 2a, selections are checked for accuracy and updated, as necessary, by repeating Step 3 until a solution that fits the observations is obtained. If the user does not like a specific selection, the user can reselect data from the initial profile, and thus a new best fit least squares linear regression can be redefined for a surface and that data selection saved instead. Once the user has the desired representation for the fault scarp components, it is saved by running the next code box. The user then loads in the next fault profile and repeats Steps 3 and 4 for each new profile. Data selections are saved as a comma-separated file format, where different columns represent the separated data for the hanging wall, footwall, and scarp segments of the profiles. These data are saved together in a separate folder for organization and to be read by the MC Slip Statistics calculator.

#### 130 4.5 Calculate Slip Statistics

Dip slip (assumed to be net slip in this instance), as well as horizontal and vertical displacement are calculated automatically in this step (Thompson et al., 2002). The advantage of this step is that multiple transects, faults, and uncertainties in input parameters are analyzed simultaneously. If the hanging wall and footwall strain marker surfaces are not parallel, as is commonly the case, the calculated vertical separation is a function of horizontal distance to the fault and the dip slip calculation requires a knowledge of the position or projection of the fault tip onto the scarp. A line fit to the scarp face contains all possible points for the intersection of the fault tip and scarp. The amount of dip slip is then split into two parts: the distance from the footwall projection up to this point and the distance from the hanging wall down to this point.

Additional input parameters are first defined, including fault dip and intersection with the scarp distributions and geologic age distributions, if available (Fig. 1). Fault dip and uncertainty therein are determined through direct measurement from outcrops, nearby paleoseismic trenches, or by estimating from geomorphic expression. A range of probability density functions (PDFs) can be assigned for fault dip as well as uncertainty of where the fault projects onto the scarp. For example, in our case study below, we chose a trapezoidal distribution for fault dip centered around the most probable dip values and a uniform distribution for the geologic age since only a minimum and maximum age are given for surfaces. Normal distributions for both parameters could've also been chosen. The user would simply signify this option (see the User Manual, which is included as a supplement to the manuscript). If the user was interested in defining separate input values for different combinations of fault scarps, the user would manually define these values for each iteration and run the code more than once.

The code conducts a calculation for the net dip-slip component, as well as the vertical separation and horizontal extension, as stated above. Geologic age data can be used to define an age distribution for the geologic surface in question and thus slip rates can be conveniently calculated.

150 The Monte Carlo approach to calculating slip statistics relies on bootstrapping repeated random samples from the PDFs of the input parameters to obtain numerical results and generate histograms with 95 percent confidence intervals for the slip statistics from multiple uncertain estimations.

Plots of slip distributions for each fault profile are displayed as output, so the user can easily visually analyze for anomalies in the dataset (Fig. 3). Lastly, the script outputs a CSV file for each group of faults analyzed simultaneously. This can be useful  
155 if the user wants to categorize data based on spatial or temporal differences; this was useful in determining displacements on different geologic surfaces, corresponding to different geologic ages, separately.

## 5 Display Data in GIS

The data calculated in the previous step can be added to the original shapefile layer to allow for spatial analysis. As outlined in the user manual, the QGIS software allows for seamless ‘joining’ of the CSV file with the original fault scarp profile  
160 shapefile layer. When using the ArcGIS software, the ArcGIS tool developed in this study, ‘attachStats2Profiles’, and its Python standalone version can also complete this task.

## 6 Case Study – Taupo Volcanic Zone (TVZ), NZ

The Taupo Volcanic Zone (TVZ), in the central North Island of New Zealand, is the volcanic arc associated with the subduction of the Pacific Plate beneath the Australian Plate (Fig. 4) (Wilson et al., 1995). Within this region, a northeast-southwest trending,  
165 250-km long, 14 to 40-km wide active rift, the Taupo Rift, has formed as a result of fore-arc rotation and subducting slab roll back (Wallace et al., 2004; Seebeck et al., 2014). Extension across the TVZ over the last 1.6 Myr is expressed primarily as regional volcanism, extensional fractures, and northeast-southwest trending normal faults (Pilar Villamor et al., 2017). Late Quaternary extension rates derived from contemporary geodetic and Quaternary fault data increase northward from 2-4 mm yr<sup>-1</sup> at the southern termination of the Taupo Rift to 10-15 mm yr<sup>-1</sup> at the Bay of Plenty coast (Fig. 4) (Villamor and Berryman,  
170 2001; Wallace et al., 2004; Lamarche et al., 2006; Villamor and Berryman, 2006).

The TVZ represents the ideal case study area to test our methodology because the Quaternary geology of the region has been extensively studied through detailed mapping of geological units and active fault locations (Fig. 4). The QMAP Geological Map of New Zealand Project, produced by GNS Science, provides the most current mapping of geology for New Zealand in a single dataset at a scale of 1:250,000 (compiled at 1:25:000 to 1:50:000 scale), which has up-to-date lithology distinctions  
175 for our study area (Leonard et al., 2010). A high-resolution DEM exists (e.g., 1-meter horizontal resolution LiDAR based) that adequately resolves meter to 50-meter scale displacements along active normal faults. A hillshade derivative was made from the DEM to image the geologic features. A detailed active fault map, previously developed to produce a fault avoidance map

for the Rotorua District Council ( 1:10,000 scale; (Villamor et al., 2010) has been used to define the location of profiles across faults. The 1: 250,000 geological map has less resolution than the fault map used and thus we have constrained our selection of profile locations to a unit that is clearly identifiable in the LiDAR and with boundaries that are relatively well represented in the lesser resolution geological units ArcGIS coverage, were the geological unit age is extracted from. Ideally the resolution of the different data layers should be of the same order.

 We analyzed fault surface displacements on the Earthquake Flat Formation ignimbrite of the Okataina Group (Nairn, 2002), a volcanic formation of pyroclastic material, lapilli, and ash, which has been dated to 60-62 ka (Wilson et al., 2007). The constructional surface of the ignimbrite is well-preserved and represents a previously continuous, sub-horizontal, planar feature, which has displaced by normal faults in the TVZ.

Here, we applied the methodology for the QGIS-based tool to a transect across the Central TVZ. By choosing to analyze fault displacements of a single age surface we can get a picture of the deformation rates across the region occupied by the surface for the time period represented by the surface chosen. In this case the Earthquake Flat ignimbrite covers practically the entire width of the active rift (only a couple of moderately high scarps on the western margin of the rift do not displace the ignimbrite). We attempted to obtain data from as close to the transect line as possible because scarp heights appear to vary along strike of the fault traces due to the complex nature of faulting in the TVZ. We analyzed 33 faults in a 25-km transect from northwest to southeast in the direction of regional extension. From the primarily northeast to southwest striking fault systems of the Central TVZ, we chose faults with significant offset (>5 m) because smaller faults contribute insignificantly to the overall extension of the region and often represent splays of the larger faults. Thus, because of the filtering small scarps and two missing moderately high-relief scarps on the west of the transect in this study, we report a minimum extension rate for the Central TVZ below.

For each fault, we identified the key fault components (e.g., fault scarp, hanging wall, and footwall) and determined slip estimates using MCSST. For our fault geometry distribution, we chose a trapezoidal distribution, centered around 70-80 degrees in dip. This is consistent with data obtained from geological observations in trenches and superficial exposures within 40 meters from the ground surface (Villamor and Berryman, 2001).

The dip slip values obtained for each fault were in line with reasonable estimates based on extensive experience conducting field campaigns in the region (e.g., altimeter measurements along transects and detailed logging of faults in exploratory trenches) and visual inspection of the digital elevation model (Villamor and Berryman, 2001; Villamor et al., 2010; P. Villamor et al., 2017). Further, the values plotted in Figure 3 are consistent with visual inspection of the distance vs. elevation profile (this study). We used recently derived age constraints on the Earthquake Flat Formation to convert these values into dip slip rates.

MCSST automatically converts dip slip rate estimates into horizontal extension rate values by using a trigonometric relationship defined by the fault angle distribution we input. This resulted in a minimum cumulative near-surface horizontal extension rate of 2.77 mm yr<sup>-1</sup> ( $\pm$  0.69 mm yr<sup>-1</sup>) summed across the mean net slip rate value for all faults along the transect. The minimum cumulative near-surface horizontal extension rate when summed across the median net slip rate values for all faults along the transect is 2.73 mm yr<sup>-1</sup> with a 95 percent confidence interval of 0.56-5.26 mm yr<sup>-1</sup>.

This is similar to the values provided by the current best-estimate of Quaternary extension rates derived from fault data of: 2.4 mm yr<sup>-1</sup> ( $\pm$  0.4 mm yr<sup>-1</sup>) for the Central TVZ (Villamor and Berryman, 2001) and only 8 km southwest of this study's transect; 2.9 mm yr<sup>-1</sup> ( $\pm$  0.74 mm yr<sup>-1</sup>) for the Northern TVZ immediately offshore (Lamarche et al., 2006); and 2.7 mm yr<sup>-1</sup> ( $\pm$  0.3 mm yr<sup>-1</sup>) for the Southern TVZ at the Tongariro Volcano latitude (Gomez-Vasconcelos, 2017).

Note that near-surface fault derived extension rates along the TVZ have been converted to higher (more realistic) total extension rates (from 4 to 15 mm yr<sup>-1</sup> from south to north) in the various studies by applying correction factors that include shallower fault dips and larger fault slips at depth, and contribution from small to moderate earthquakes (small faults that do not rupture the surface) (see Villamor and Berryman, 2001 for method). The differences in fault-derived total extension rate from south to north are mainly dependent on the average "deep" fault dip value chosen (60° for Southern and Central TVZ and 45 ° for Northern TVZ), which remains on the largest uncertainties for the TVZ faults. Geodetic derived extension rates show a clear extension rate increase from north to south (Wallace et al., 2004).

The near-surface extension rate obtained by Villamor and Berryman (2001) contains a mixture of ages, i.e., individual fault slip rates were obtained with chorological marker ranging from 8 to 60 ka. They were converted to slip rates for a chosen 20 ka timeframe and then added to estimate rift extension rate. Given the large temporal variations in slip rate for some faults in the area of our transect (some faults can have quiescence periods of 10ka (Nicol et al., 2006) and the fast rift evolution (rapid rift narrowing; Villamor et al 2017), the near-surface extension rate can be considered to better represent the average extension rate calculated here for the last 60 ky.

## 230 7 Efficiency of the MCSST Toolkit

The utility of the MCSST toolkit is best demonstrated by the efficiency with which this study was conducted and the agreement with the current geological understanding of the Central TVZ. Once our methodology was defined and the workflow implemented, the analysis of the transect (33 faults across 25 km) was completed in one day at a work station. To confirm the results, the entire process was completed again by multiple users, which resulted in similar outcomes across the board. We note that installing and running the Python code packages, navigating the GIS software, and inputting parameters and gaining comfort with the interface for the Jupyter Notebook pose the greatest challenges to employing the MCSST toolkit, so we provide a detailed user manual to accompany the manuscript to lower the barrier of entry.

## 8 Conclusions

The Monte Carlo Slip Statistics Toolkit (MCSST) allows users to rapidly and accurately estimate fault slip across several faults imaged in DEMs. This approach improves upon similar studies because it allows for rapid analysis of tens to hundreds of faults simultaneously within GIS, and anomalous values can quickly be identified. The underlying functions are built upon open-source Python code base and are specifically designed to lower the bar of entry for researchers wishing to include robust, quantitative fault scarp analysis in their work or teaching.

Application of this method may contribute to a wide range of regional and local paleoseismic studies with adequate high-  
245 resolution DEM coverage, both regional fault source characterization for seismic hazard and/or estimating geologic slip and  
strain rates. In our case study, initial estimates for minimum near-surface extension rates along a northwest to southeast transect  
(33 faults; 25 km) across the Taupo Volcanic Zone are in line with the current paleoseismological and tephrochronological  
understanding of the region and provide useful constraints on the uncertainty associated with these values (Villamor and  
Berryman, 2001).

250 *Code availability.* All codes, as well as the User Manual can be found at this Github Repository: [https://github.com/wolfefranklin/MCSST\\_2019](https://github.com/wolfefranklin/MCSST_2019)

*Team list.* Franklin D. Wolfe (FW), Timothy A. Stahl (TS), Pilar Villamor (PV), Biljana Lukovic (BL)

*Data availability.* Datasets used in this study include the New Zealand Active Fault database, which can be found here: <http://data.gns.cri.nz/af/>,  
the Geologic Map of New Zealand, which can be found here: <https://www.gns.cri.nz/Home/Our-Science/Land-and-Marine-Geoscience/Regional-Geology/Geological-Maps/1-250-000-Geological-Map-of-New-Zealand-QMAP/Digital-Data-and-Downloads>, and elevation data, which can  
255 be found here: <https://data.linz.govt.nz/data/category/elevation/>

*Author contributions.* FW, TS, BL contributed to code development and testing. PV contributed to data analysis and case study development.  
All authors contributed to drafting the manuscript. BL and PV contributed data sets. PV and TS contributed background material and context.

*Competing interests.* The authors declare that they have no conflict of interest.

*Disclaimer.* MIT License

260 Copyright (c) 2019 wolfefranklin

Permission is hereby granted, free of charge, to any person obtaining a copy of this software and associated documentation files (the  
"Software"), to deal in the Software without restriction, including without limitation the rights to use, copy, modify, merge, publish, distribute,  
sublicense, and/or sell copies of the Software, and to permit persons to whom the Software is furnished to do so, subject to the following  
conditions:

265 The above copyright notice and this permission notice shall be included in all copies or substantial portions of the Software.

THE SOFTWARE IS PROVIDED "AS IS", WITHOUT WARRANTY OF ANY KIND, EXPRESS OR IMPLIED, INCLUDING BUT  
NOT LIMITED TO THE WARRANTIES OF MERCHANTABILITY, FITNESS FOR A PARTICULAR PURPOSE AND NONINFRINGEMENT-

MENT. IN NO EVENT SHALL THE AUTHORS OR COPYRIGHT HOLDERS BE LIABLE FOR ANY CLAIM, DAMAGES OR OTHER  
LIABILITY, WHETHER IN AN ACTION OF CONTRACT, TORT OR OTHERWISE, ARISING FROM, OUT OF OR IN CONNECTION  
270 WITH THE SOFTWARE OR THE USE OR OTHER DEALINGS IN THE SOFTWARE.

*Acknowledgements.* The authors would like to recognize support from Andy Howell, Kate Clark, and Regine Morgenstern (GNS Science) for support with this project. We would also like to thank the Structural Geology and Earth Resources Group and Earth and Planetary Sciences Department at Harvard University for funding and support for this project.

## References

- 275 Amos, C. B., K. I. Kelson, D. H. Rood, D. T. Simpson, and R. S. Rose, Late Quaternary slip rate on the Kern Canyon fault at Soda Spring, Tulare County, California, *Lithosphere*, 2, no. 6, 411–417, doi: 10.1130/L100.1, 2010.
- Avouac, J.-P., Analysis of scarp profiles: Evaluation of errors in morphologic dating, *J. Geophys. Res. Solid Earth*, 98, no. B4, 6745–6754, doi: 10.1029/92JB01962, 1993.
- Bartolini, S., A. Cappello, J. Martí Molist, and C. Del Negro, QVAST: A new Quantum GIS plugin for estimating volcanic susceptibility, doi: 10.5194/nhess-13-3031-2013, 2013.
- 280 Bemis, S. P., S. Micklethwaite, D. Turner, M. R. James, S. Akciz, S. T. Thiele, and H. A. Bangash, Ground-based and UAV-Based photogrammetry: A multi-scale, high-resolution mapping tool for structural geology and paleoseismology, *J. Struct. Geol.*, 69, 163–178, doi: 10.1016/j.jsg.2014.10.007, 2014.
- DeLong, S., G. E. Hilley, M. J. Rymer, and C. S. Prentice, Fault zone structure from topography: Signatures of en echelon fault slip at Mustang Ridge on the San Andreas Fault, Monterey County, California: Fault Zone Structure at Mustang Ridge, 2010.
- 285 Forte, A. M., and K. X. Whipple, Short communication: The Topographic Analysis Kit (TAK) for TopoToolbox, *Earth Surf. Dyn.*, 7, no. 1, 87–95, doi: <https://doi.org/10.5194/esurf-7-87-2019>, 2019.
- Fossen, H., and A. Rotevatn, Fault linkage and relay structures in extensional settings—A review, *Earth-Sci. Rev.*, 154, 14–28, doi: 10.1016/j.earscirev.2015.11.014, 2016.
- 290 Gallant, J. C., and M. F. Hutchinson, Scale dependence in terrain analysis, *Math. Comput. Simul.*, 43, no. 3, 313–321, doi: 10.1016/S0378-4754(97)00015-3, 1997.
- Gillespie, P. A., J. J. Walsh, and J. Watterson, Limitations of dimension and displacement data from single faults and the consequences for data analysis and interpretation, *J. Struct. Geol.*, 14, no. 10, 1157–1172, doi: 10.1016/0191-8141(92)90067-7, 1992.
- Gomez-Vasconcelos, M. G., Paleoseismology, seismic hazard and volcano-tectonic interactions in the Tongariro Volcanic Centre, New Zealand, PhD Thesis, Massey University, Palmerston North, Manawatu, 2017.
- 295 Hilley, G. E., S. DeLong, C. Prentice, K. Blisniuk, and J. Arrowsmith, Morphologic dating of fault scarps using airborne laser swath mapping (ALSM) data, *Geophys. Res. Lett.*, 37, no. 4, doi: 10.1029/2009GL042044, 2010.
- Hodge, M., J. Biggs, Å. Fagereng, A. Elliott, H. Mdala, and F. Mphepo, A semi-automated algorithm to quantify scarp morphology (SPARTA): application to normal faults in southern Malawi, *Solid Earth*, 10, no. 1, 27–57, doi: <https://doi.org/10.5194/se-10-27-2019>, 2019.
- 300 Hopkins, K. G., S. Lamont, P. R. Claggett, G. B. Noe, A. C. Gellis, C. B. Lawrence, M. J. Metes, M. P. Strager, and J. M. Strager, Stream Channel and Floodplain Metric Toolbox, US Geol. Surv. Data Release, 2018.
- Hugentobler, M., Quantum GIS, in *Encyclopedia of GIS* S. Shekhar, and H. Xiong (Editors), Springer US, Boston, MA, 935–939, 2018.
- Kirby, E., and K. X. Whipple, Expression of active tectonics in erosional landscapes, *J. Struct. Geol.*, 44, 54–75, doi: 10.1016/j.jsg.2012.07.009, 2012.
- 305 Klimczak, C., C. L. Kling, and P. K. Byrne, Topographic Expressions of Large Thrust Faults on Mars, *J. Geophys. Res. Planets*, 1123, no. 8, 1973–1995, doi: 10.1029/2017JE005448, 2018.
- Lamarche, G., P. M. Barnes, and J. M. Bull, Faulting and extension rate over the last 20,000 years in the offshore Whakatane Graben, New Zealand continental shelf, *Tectonics*, 25, no. 4, doi: 10.1029/2005TC001886, 2006.

- Leonard, G. S., J. G. Begg, and C. J. N. Wilson, Geology of the Rotorua area, Digital Database, GNS Science, Lower Hutt, QMAP, Digital Database, 1:250,000, 2010.
- Middleton, T., R. T. Walker, B. Parsons, Q. Lei, Y. Zhou, and Z. Ren, A major, intraplate, normal-faulting earthquake: The 1739 Yinchuan event in northern China, *J. Geophys. Res. Solid Earth*, 12, no. 1, 293–320, 2016.
- Nairn, I. A., Geology of the Okataina Volcanic Center, 1 sheet + 156 p., GNS Science, 1 sheet + 156 p., 1:50,000.
- 315 Nicol, A., J. Walsh, K. Berryman, and P. Villamor, 2006, Interdependence of fault displacement rates and paleoearthquakes in an active rift, *Geology*, 34, no. 10, 865–868, doi: 10.1130/G22335.1, 2002.
- Pérouse, E., and B. P. Wernicke, Spatiotemporal evolution of fault slip rates in deforming continents: The case of the Great Basin region, northern Basin and Range province, *Geosphere*, 13, no. 1, 112–135, doi: 10.1130/GES01295.1, 2017.
- Personius, S., R. W. Briggs, J. Z. Maharrey, S. J. Angster, and S. A. Mahan, A paleoseismic transect across the northwestern Basin and Range Province, northwestern Nevada and northeastern California, USA, *Geosphere*, 13, no. 3, 782810, doi: 10.1130/GES01380.1, 2017.
- 320 Rood, D. H., D. W. Burbank, and R. C. Finkel, Spatiotemporal patterns of fault slip rates across the Central Sierra Nevada frontal fault zone, *Earth Planet. Sci. Lett.*, 301, no. 3, 457–468, doi: 10.1016/j.epsl.2010.11.006, 2011.
- Schwanghart, W., and D. Scherler, TopoToolbox 2 – MATLAB-based software for topographic analysis and modeling in Earth surface sciences., *Earth Surf. Dyn.*, 2, 1–7, doi: 10.5194/esurf-2-1-2014, 2014.
- 325 Seebeck, H., A. Nicol, P. Villamor, J. Ristau, and J. Pettinga, Structure and kinematics of the Taupo Rift, New Zealand, *Tectonics*, 33, no. 6, 1178–1199, doi: 10.1002/2014TC003569, 2014.
- Spencer, J., Structural analysis of three extensional detachment faults with data from the 2000 Space-Shuttle Radar Topography Mission, *GSA Today*, 4–10, doi: 10.1130/GSATG59A.1, 2010.
- Stahl, T., and N. A. Niemi, Late Quaternary faulting in the Sevier Desert driven by magmatism, *Sci. Rep.*, 7, doi: 10.1038/srep44372, 2017.
- 330 Stahl, T., M. C. Quigley, A. McGill, and M. S. Bebbington, Modeling Earthquake Moment Magnitudes on Imbricate Reverse Faults from Paleoseismic Data: Fox Peak and Forest Creek Faults, South Island, New Zealand Modeling Earthquake Moment Magnitudes on Imbricate Reverse Faults, *Bull. Seismol. Soc. Am.*, 106, no. 5, 2345–2363, doi: 10.1785/0120150215, 2016.
- Stewart, N., Y. Gaudemer, I. Manighetti, L. Serreau, A. Vincendeau, S. DOMINGUEZ, L. Matteo, and J. MALAVIEILLE, "3D\_Fault\_Offsets," a Matlab Code to Automatically Measure Lateral and Vertical Fault Offsets in Topographic Data: Application to San Andreas, Owens Valley, and Hope Faults, *J. Geophys. Res. Solid Earth*, 123, no. 1, 815–835, doi: 10.1002/2017JB014863, 2018.
- 335 Tebano, C., F. Pasanisi, and S. Grauso, QMorphoStream: processing tools in QGIS environment for the quantitative geomorphic analysis of watersheds and river networks, *Earth Sci. Inform.*, 10, no. 2, 257–268, doi: 10.1007/s12145-016-0284-0, 2017.
- Thompson, S. T., R. J. Weldon, C. M. Rubin, K. Abdrakmatov, P. Molnar, and G. W. Berger, Late Quaternary slip rates across the central Tien Shan, Kyrgyzstan, central Asia, *J. Geophys. Res.*, 107, no. B9, 2002.
- 340 Villamor, P., and K. Berryman, A late Quaternary extension rate in the Taupo Volcanic Zone, New Zealand, derived from fault slip data, *N. Z. J. Geol. Geophys.*, 44, no. 2, 243–269, doi: 10.1080/00288306.2001.9514937, 2001.
- Villamor, P., and K. R. Berryman, Late Quaternary geometry and kinematics of faults at the southern termination of the Taupo Volcanic Zone, New Zealand, *N. Z. J. Geol. Geophys.*, 49, no. 1, 1–21, doi: 10.1080/00288306.2006.9515144, 2006.
- Villamor, Pilar, K. Berryman, S. Ellis, G. Schreurs, L. M. Wallace, G. S. Leonard, R. Langridge, and W. Ries, Rapid Evolution of Subduction-Related Continental Intraarc Rifts: The Taupo Rift, New Zealand: Rapid Evolution: Taupo Rift, New Zealand, *Tectonics*, 36, doi: 10.1002/2017TC004715, 2017.
- 345



- Villamor, P., K. R. Berryman, S. M. Ellis, G. Schreurs, L. M. Wallace, G. S. Leonard, R. M. Langridge, and W. F. Ries, Rapid Evolution of Subduction-Related Continental Intraarc Rifts: The Taupo Rift, New Zealand, *Tectonics*, 36, no. 10, 2250–2272, doi: 10.1002/2017TC004715, 2017.
- 350 Villamor, P., W. F. Ries, and A. Zajac, 2010 Rotorua District Council hazard studies: active fault hazards., Consultancy Report 182, GNS Science, 28 p., 2010.
- Wallace, R. E., Profiles and ages of young fault scarps, north-central Nevada, *GSA Bull.*, 88, no. 9, 1267–1281, doi: 10.1130/0016-7606(1977)88<1267:PAAOYF>2.0.CO;2, 1977.
- Wallace, L. M., J. Beavan, R. McCaffrey, and D. Darby, Subduction zone coupling and tectonic block rotations in the North Island, New Zealand, *J. Geophys. Res. Solid Earth*, 109, no. B12, doi: 10.1029/2004JB003241, 2004.
- 355 Westoby, M. J., J. Brasington, N. F. Glasser, M. J. Hambrey, and J. M. Reynolds, ‘Structure-from-Motion’ photogrammetry: A low-cost, effective tool for geoscience applications, *Geomorphology*, 179, 300–314, doi: 10.1016/j.geomorph.2012.08.021, 2012.
- Westra, E., *Building Mapping Applications with QGIS*, Packt Publishing Ltd., 2014.
- Whipple, K. X., M. Shirzaei, K. V. Hodges, and J. Ramon Arrowsmith, Active shortening within the Himalayan orogenic wedge implied by the 2015 Gorkha earthquake, *Nat. Geosci.*, 9, no. 9, 711–716, doi: 10.1038/ngeo2797, 2016.
- 360 Whipple, K., C. Wobus, B. Crosby, E. Kirby, and D. Sheehan, New Tools for Quantitative Geomorphology: Extraction and Interpretation of Stream Profiles from Digital Topographic Data, *GSA Annu. Meet.*, 30, 2007.
- Whittaker, A. C., M. Attal, P. A. Cowie, G. E. Tucker, and G. Roberts, Decoding temporal and spatial patterns of fault uplift using transient river long profiles, *Geomorphology*, 100, no. 3, 506–526, doi: 10.1016/j.geomorph.2008.01.018, 2008.
- 365 Wilson, C. J. N., B. F. Houghton, M. O. McWilliams, M. A. Lanphere, S. D. Weaver, and R. M. Briggs, Volcanic and structural evolution of Taupo Volcanic Zone, New Zealand: a review, *J. Volcanol. Geotherm. Res.*, 68, no. 1, 1–28, doi: 10.1016/0377-0273(95)00006-G, 1995.
- Wilson, C. J. N., D. A. Rhoades, M. A. Lanphere, A. T. Calvert, B. F. Houghton, S. D. Weaver, and J. W. Cole, A multiple-approach radiometric age estimate for the Rotoiti and Earthquake Flat eruptions, New Zealand, with implications for the MIS 4/3 boundary, *Quat. Sci. Rev.*, 26, no. 13, 1861–1870, doi: 10.1016/j.quascirev.2007.04.017, 2007.
- 370 Zhou, Y., B. Parsons, J. R. Elliott, I. Barisin, and R. T. Walker, Assessing the ability of Pleiades stereo imagery to determine height changes in earthquakes: A case study for the El Mayor-Cucapah epicentral area, *J. Geophys. Res. Solid Earth*, 120, no. 12, 8793–8808, doi: 10.1002/2015JB012358, 2015.
- Zielke, O., Y. Klinger, and J. R. Arrowsmith, Fault slip and earthquake recurrence along strike-slip faults — Contributions of high-resolution geomorphic data, *Tectonophysics*, 638, 43–62, doi: 10.1016/j.tecto.2014.11.004

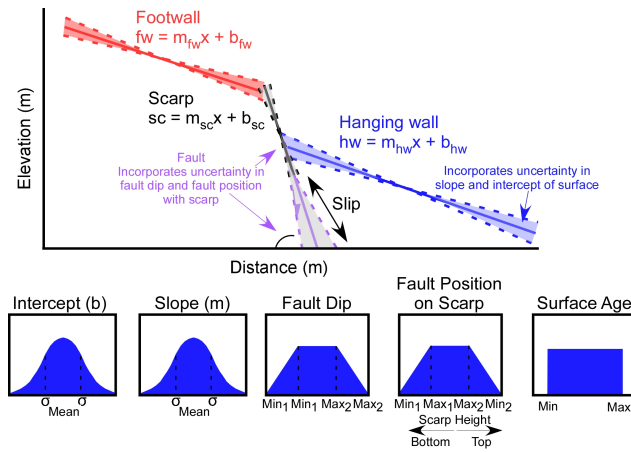

**Figure 1.** Slip statistics inputs. A schematic of inputs into the Monte Carlo Slip Statistics code, which include uncertainty in intercept, slope, fault dip, fault position on scarp, and the age of the geologic surface in question. For surface age, a uniform distribution is shown; however, the user could define a normal or trapezoidal distribution as well.

(a)

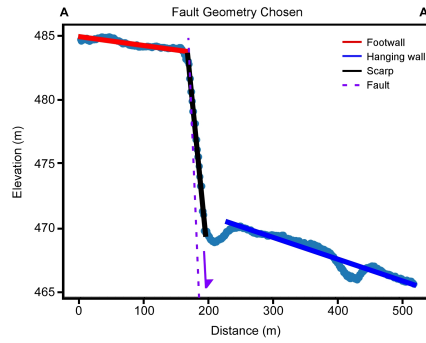

(b)

| Add Row |                | Remove Row   |               |                        |                        |  |  |
|---------|----------------|--------------|---------------|------------------------|------------------------|--|--|
| Index   | Section Number | Distance (m) | Elevation (m) | Minimum Age of Surface | Maximum Age of Surface |  |  |
| 1       | 9              | 241          |               |                        | 62000                  |  |  |
| 2       | 9              | 242          |               |                        | 62000                  |  |  |
| 3       | 9              | 243          |               |                        | 62000                  |  |  |
| 4       | 9              | 244          |               |                        | 62000                  |  |  |
| 5       | 9              | 245          | 472.7335      | 60000                  | 62000                  |  |  |
| 6       | 9              | 246          | 472.8932      | 60000                  | 62000                  |  |  |
| 7       | 9              | 247          | 473.0087      | 60000                  | 62000                  |  |  |
| 8       | 9              | 248          | 473.1635      | 60000                  | 62000                  |  |  |
| 9       | 9              | 249          | 473.186       | 60000                  | 62000                  |  |  |
| 10      | 9              | 250          | 473.2963      | 60000                  | 62000                  |  |  |
| 11      | 9              | 251          | 473.2963      | 60000                  | 62000                  |  |  |
| 12      | 9              | 252          | 473.3813      | 60000                  | 62000                  |  |  |
| 13      | 9              | 253          | 473.3415      | 60000                  | 62000                  |  |  |
| 14      | 9              | 254          | 473.0744      | 60000                  | 62000                  |  |  |
| 15      | 9              | 255          | 472.8387      | 60000                  | 62000                  |  |  |
| 16      | 9              | 256          | 472.499       | 60000                  | 62000                  |  |  |

**Figure 2.** The general workflow. A) A user-defined profile drawn perpendicular to the strike of a mapped fault. For location of this feature, see Figure 4. The red, blue, and black lines represent linear least square fits to the footwall, hanging wall, and scarp of a normal fault, respectively. The purple line is a representation of the geometry of a fault responsible for this scarp. B) Sliders can be used within the data frame manipulation tool to select data points to represent each relevant component of the fault scarp (e.g., hanging wall, footwall, and scarp). Initially, the red line is fit to all the data in the profile. By using the sliders, you can select a subset of the data as shown in A for the generation of the red line. Once data points are selected, the user can visualize the choices for fault component selection before moving forward and calculating slip statistics for the fault in the same Jupyter Notebook environment. The red, blue, and black lines in A are generated through this method.

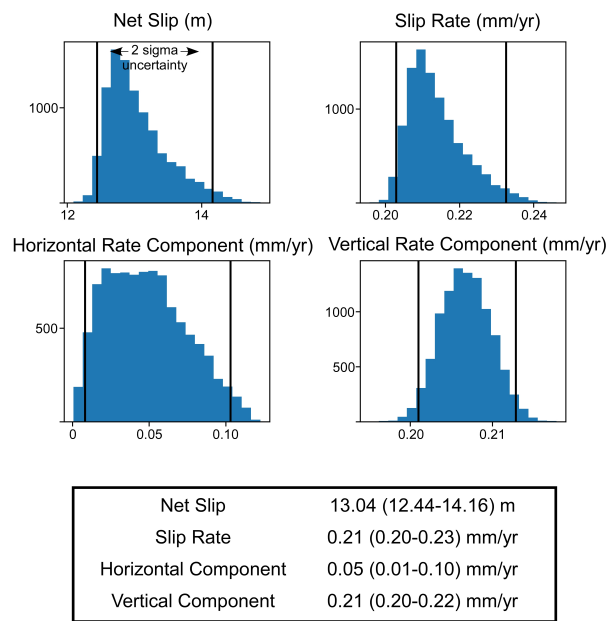

**Figure 3.** The slip statistics results from the fault scarp visualized in Figure 2 and with location shown in Figure 4.

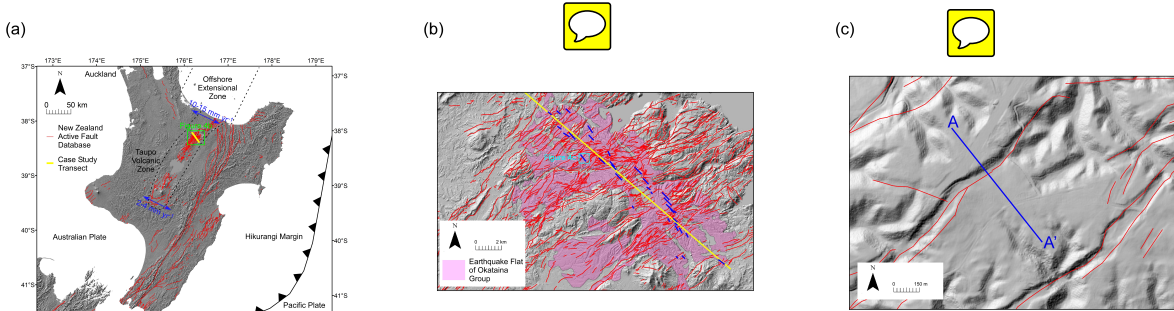

**Figure 4.** Taupo Volcanic Zone Case Study. Base images of A, B, and C are LiDAR hillshade maps of the North Island and Taupo Volcanic Zone, New Zealand. A) Tectonic features of New Zealand where the green box represents the enlarged image in B. The red fault traces are from the New Zealand Active Faults Database (NZAFD). Active faults have deformed the ground surface of New Zealand within the last 125,000 years. The blue arrow and rate represents geologic extension rates from geodetic and Quaternary fault data (P. Villamor et al., 2017). The yellow line represents the Case Study Transect. B) Fault scarp profiles used in this case study are shown in blue and across the northwest-southeast transect shown in yellow. Mapped faults in the region are shown in red (NZAFD). For simplicity, only the Earthquake Flat Formation of the Okataina Group outcrops is shown from the Geologic Map of New Zealand Project (GMAP). These are the formations that were analyzed in this study. The light blue box represents the extent of part C. C) LiDAR hillshade map to demonstrate the resolution of the DEM and location of profile shown in Figure 2. sualized in Figure 2 and with location shown in Figure 4.
